# Supplementary material
Source: PubMed Central journal article supplement (PMC4671369)
Supplement: NIHMS405173-supplement-Grkovic_supp_data.pdf [file NIHMS405173-supplement-Grkovic_supp_data.pdf]

**Isolation and Identification of Cryptocaryols A-H, Pyrone-containing 1,3-polyols  
Implicated in Stabilizing the Tumor Suppressor Pcd4**

Tanja Grkovic, Johanna S. Blee, Nancy H. Colburn, Tobias Schmid, Cheryl L. Thomas,  
Curtis J. Henrich, James B. McMahon, and Kirk R. Gustafson \*

**Supporting Information**

Table of contents:

|                                                                                                            |      |
|------------------------------------------------------------------------------------------------------------|------|
| <b>Figure S1.</b> $^1\text{H}$ NMR spectrum of cryptocaryol A ( <b>1</b> ) in $\text{CD}_3\text{OD}$ .     | SI4  |
| <b>Figure S2.</b> $^{13}\text{C}$ NMR spectrum of cryptocaryol A ( <b>1</b> ) in $\text{CD}_3\text{OD}$ .  | SI5  |
| <b>Figure S3.</b> Edited HSQC spectrum of cryptocaryol A ( <b>1</b> ) in $\text{CD}_3\text{OD}$ .          | SI6  |
| <b>Figure S4.</b> HMBC spectrum of cryptocaryol A ( <b>1</b> ) in $\text{CD}_3\text{OD}$ .                 | SI7  |
| <b>Figure S5.</b> LRLCMS spectra of cryptocaryol A ( <b>1</b> ).                                           | SI8  |
| <b>Figure S6.</b> HRESIMS spectrum of cryptocaryol A ( <b>1</b> ).                                         | SI9  |
| <b>Figure S7.</b> HRESIMS/MS spectra of cryptocaryol A ( <b>1</b> ).                                       | SI9  |
| <b>Figure S8.</b> $^1\text{H}$ NMR spectrum of cryptocaryol B ( <b>2</b> ) in $\text{CD}_3\text{OD}$ .     | SI10 |
| <b>Figure S9.</b> $^{13}\text{C}$ NMR spectrum of cryptocaryol B ( <b>2</b> ) in $\text{CD}_3\text{OD}$ .  | SI11 |
| <b>Figure S10.</b> LRLCMS spectra of cryptocaryol B ( <b>2</b> ).                                          | SI12 |
| <b>Figure S11.</b> HRESIMS spectrum of cryptocaryol B ( <b>2</b> ).                                        | SI13 |
| <b>Figure S12.</b> HRESIMS/MS spectrum of cryptocaryol B ( <b>2</b> ).                                     | SI13 |
| <b>Figure S13.</b> $^1\text{H}$ NMR spectrum of cryptocaryol C ( <b>3</b> ) in $\text{CD}_3\text{OD}$ .    | SI14 |
| <b>Figure S14.</b> $^{13}\text{C}$ NMR spectrum of cryptocaryol C ( <b>3</b> ) in $\text{CD}_3\text{OD}$ . | SI15 |
| <b>Figure S15.</b> LRLCMS spectra of cryptocaryol C ( <b>3</b> ).                                          | SI16 |
| <b>Figure S16.</b> HRESIMS spectrum of cryptocaryol C ( <b>3</b> ).                                        | SI17 |
| <b>Figure S17.</b> HRESIMS/MS spectra of cryptocaryol C ( <b>3</b> ).                                      | SI17 |
| <b>Figure S18.</b> $^1\text{H}$ NMR spectrum of cryptocaryol D ( <b>4</b> ) in $\text{CD}_3\text{OD}$ .    | SI18 |
| <b>Figure S19.</b> $^{13}\text{C}$ NMR spectrum of cryptocaryol D ( <b>4</b> ) in $\text{CD}_3\text{OD}$ . | SI19 |
| <b>Figure S20.</b> LRLCMS spectra of cryptocaryol D ( <b>4</b> ).                                          | SI20 |
| <b>Figure S21.</b> HRESIMS spectrum of cryptocaryol D ( <b>4</b> ).                                        | SI21 |
| <b>Figure S22.</b> HRESIMS/MS spectrum of cryptocaryol D ( <b>4</b> ).                                     | SI21 |
| <b>Figure S23.</b> $^1\text{H}$ NMR spectrum of cryptocaryol E ( <b>5</b> ) in $\text{CD}_3\text{OD}$ .    | SI22 |
| <b>Figure S24.</b> $^{13}\text{C}$ NMR spectrum of cryptocaryol E ( <b>5</b> ) in $\text{CD}_3\text{OD}$ . | SI23 |
| <b>Figure S25.</b> LRLCMS spectra of cryptocaryol E ( <b>5</b> ).                                          | SI24 |
| <b>Figure S26.</b> HRESIMS spectrum of cryptocaryol E ( <b>5</b> ).                                        | SI25 |

|                                                                                                       |      |
|-------------------------------------------------------------------------------------------------------|------|
| <b>Figure S27.</b> HRESIMS/MS spectra of cryptocaryol E ( <b>5</b> ).                                 | SI25 |
| <b>Figure S28.</b> <sup>1</sup> H NMR spectrum of cryptocaryol F ( <b>6</b> ) in CD <sub>3</sub> OD.  | SI26 |
| <b>Figure S29.</b> <sup>13</sup> C NMR spectrum of cryptocaryol F ( <b>6</b> ) in CD <sub>3</sub> OD. | SI27 |
| <b>Figure S30.</b> LRLCMS spectra of cryptocaryol F ( <b>6</b> ).                                     | SI28 |
| <b>Figure S31.</b> HRESIMS spectrum of cryptocaryol F ( <b>6</b> ).                                   | SI29 |
| <b>Figure S32.</b> HRESIMS/MS spectra of cryptocaryol F ( <b>6</b> ).                                 | SI29 |
| <b>Figure S33.</b> <sup>1</sup> H NMR spectrum of cryptocaryol G ( <b>7</b> ) in CD <sub>3</sub> OD.  | SI30 |
| <b>Figure S34.</b> <sup>13</sup> C NMR spectrum of cryptocaryol G ( <b>7</b> ) in CD <sub>3</sub> OD. | SI31 |
| <b>Figure S35.</b> LRLCMS spectra of cryptocaryol G ( <b>7</b> ).                                     | SI32 |
| <b>Figure S36.</b> HRESIMS spectrum of cryptocaryol G ( <b>7</b> ).                                   | SI33 |
| <b>Figure S37.</b> HRESIMS/MS spectra of cryptocaryol G ( <b>7</b> ).                                 | SI33 |
| <b>Figure S38.</b> <sup>1</sup> H NMR spectrum of cryptocaryol H ( <b>8</b> ) in CD <sub>3</sub> OD.  | SI34 |
| <b>Figure S39.</b> <sup>13</sup> C NMR spectrum of cryptocaryol H ( <b>8</b> ) in CD <sub>3</sub> OD. | SI35 |
| <b>Figure S40.</b> LRLCMS spectra of cryptocaryol H ( <b>8</b> ).                                     | SI36 |
| <b>Figure S41.</b> HRESIMS spectrum of cryptocaryol H ( <b>8</b> ).                                   | SI37 |
| <b>Figure S42.</b> HRESIMS/MS spectra of cryptocaryol H ( <b>8</b> ).                                 | SI37 |
| <b>Table S1.</b> <sup>13</sup> C NMR data for cryptocaryols A-H ( <b>1-8</b> ) in CD <sub>3</sub> OD. | SI38 |

**Figure S1.**  $^1\text{H}$  NMR spectrum of cryptocaryol A (**1**) in  $\text{CD}_3\text{OD}$ .

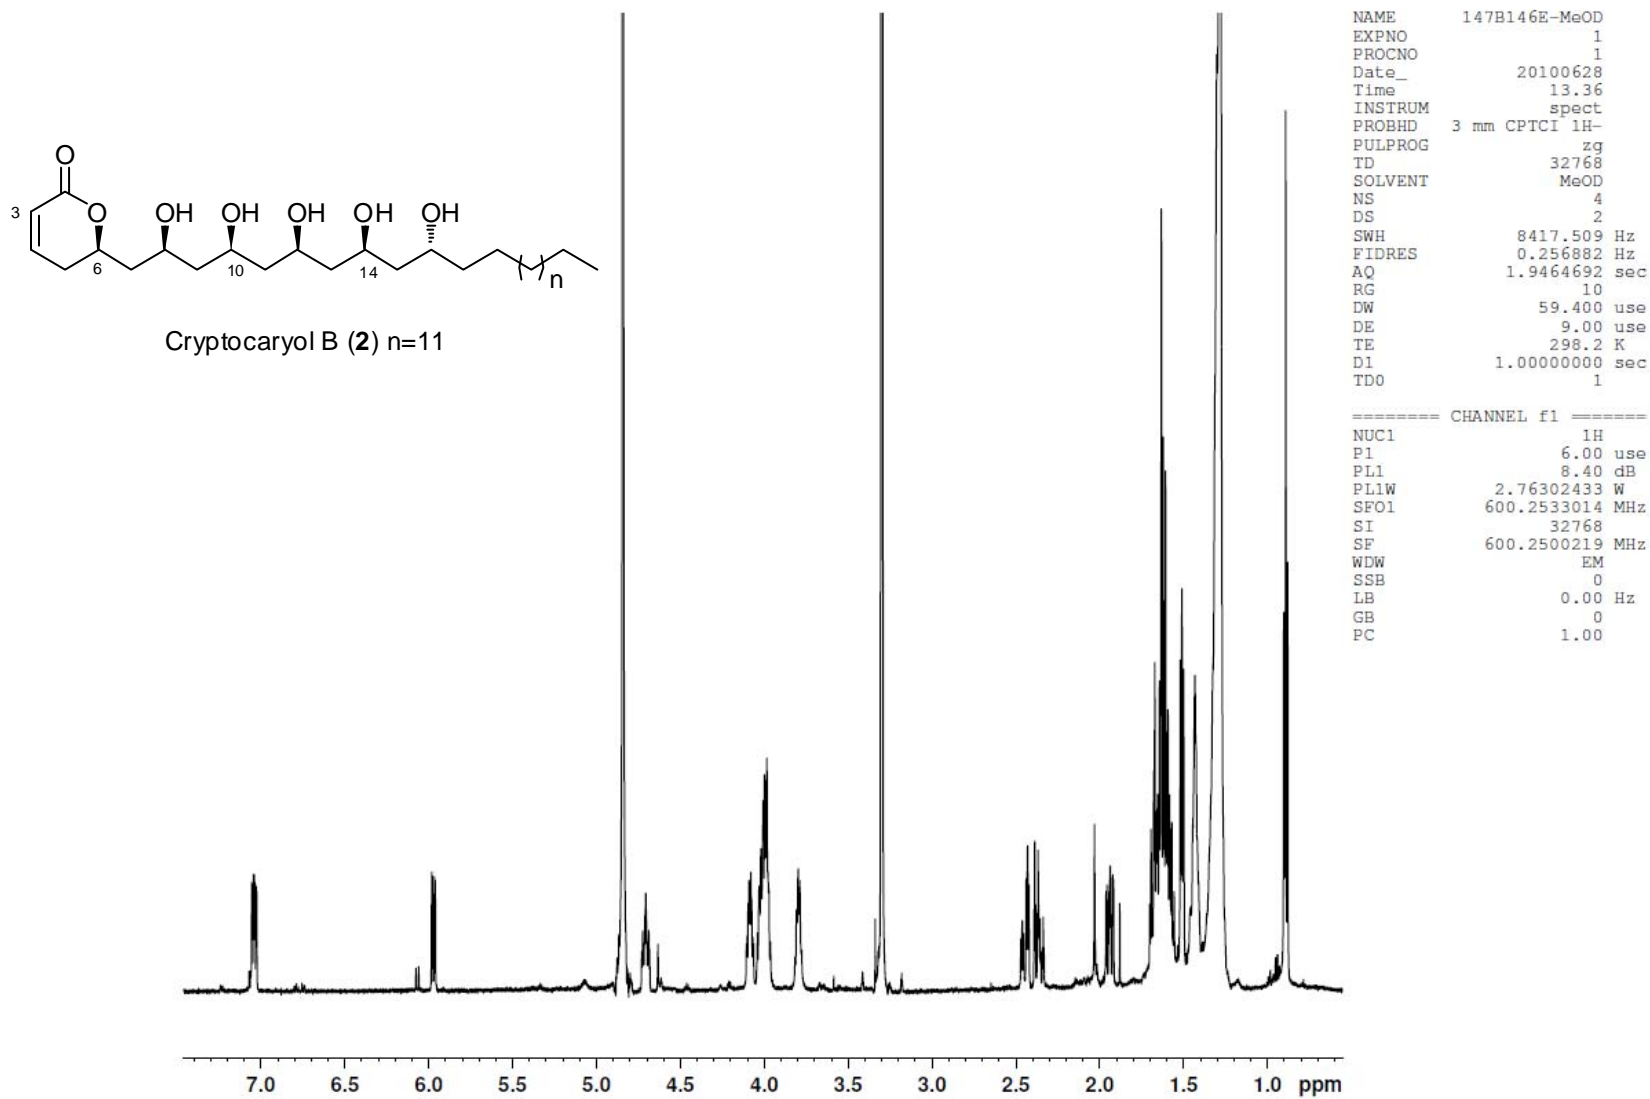

**Figure S2.**  $^{13}\text{C}$  NMR spectrum of cryptocaryol A (**1**) in  $\text{CD}_3\text{OD}$ .

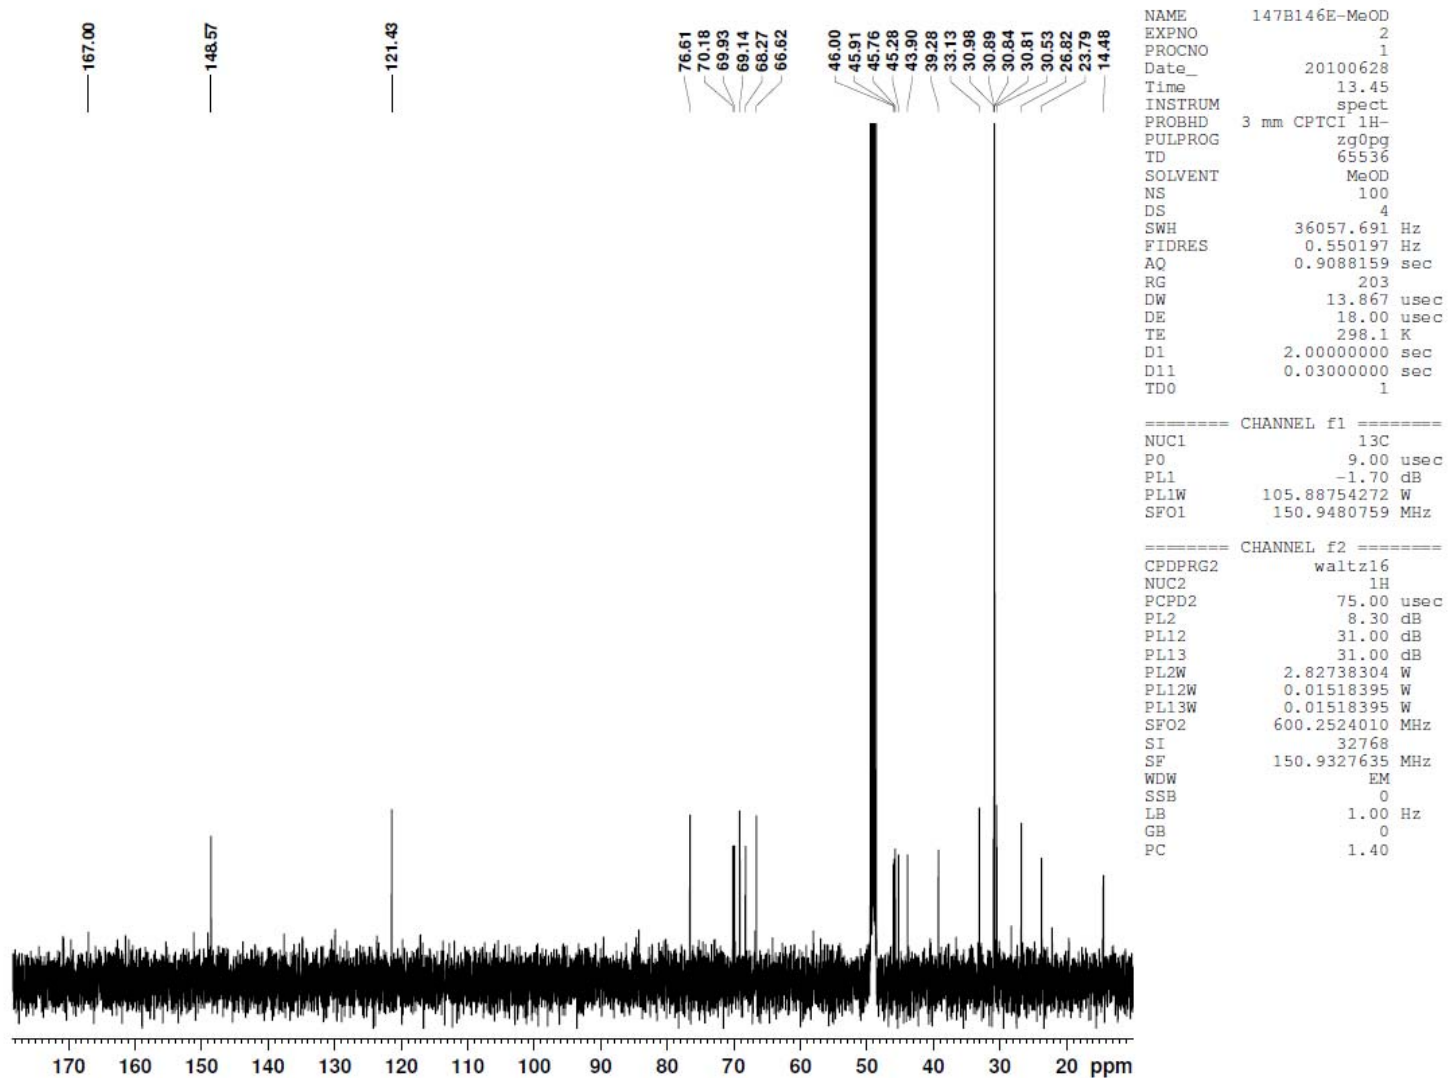

Figure S3. Edited HSQC spectrum of cryptocaryol A (1) in CD<sub>3</sub>OD.

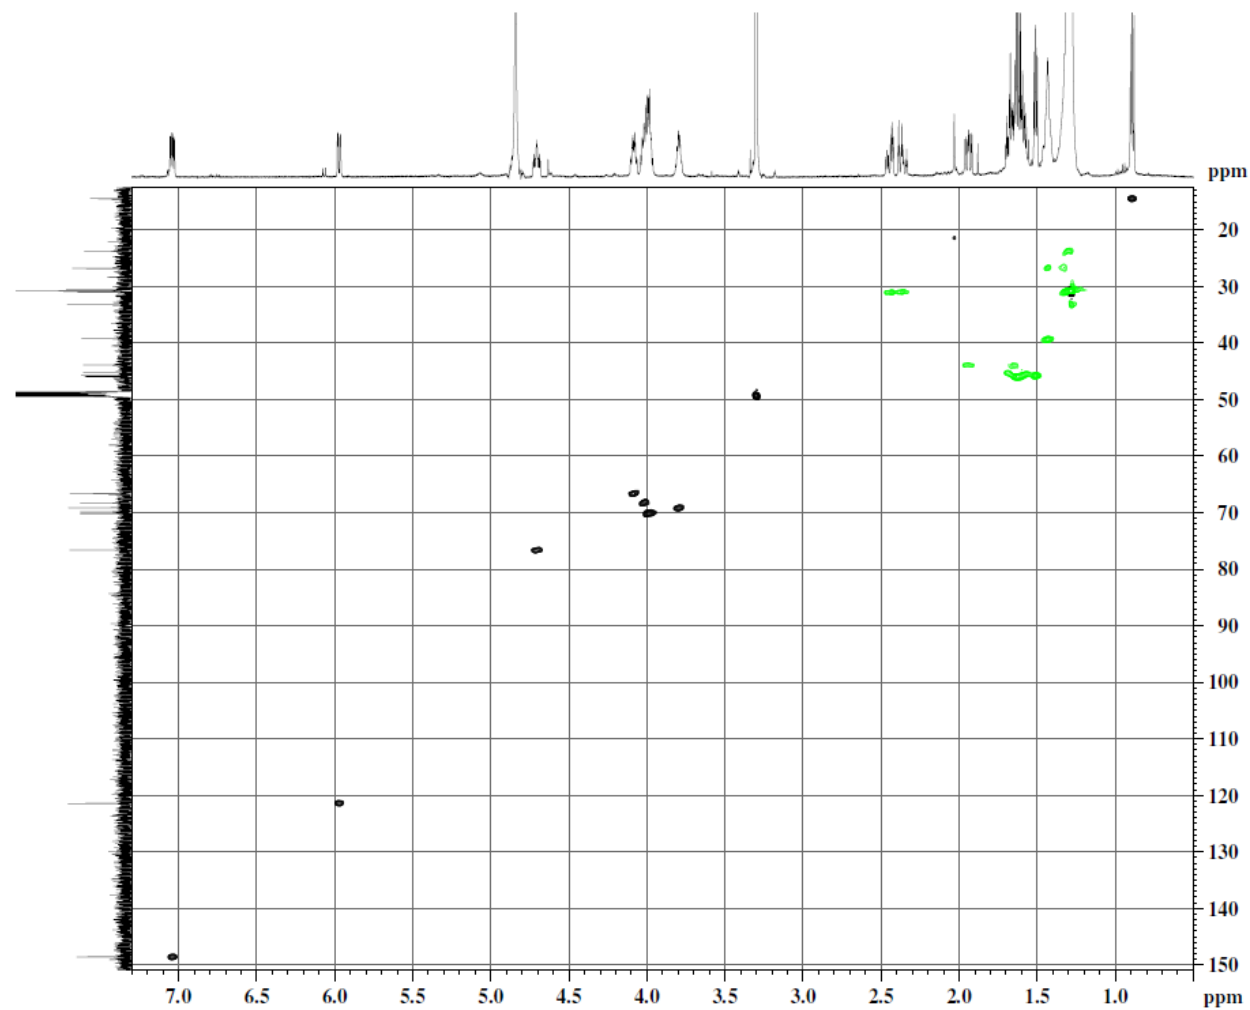

```

NAME 147H1462-Nu2D
EXPNO 1
PROCNO 1
DATE_ 20100701
TIME 20.59
INSTRUM spect
PROBHD 5 mm CPYCI 1H-
PULPROG hzgpgd04pgg14p2.4
TD 1024
SOLVENT Me2O
NS 8
DS 32
SWH 5411.250 Hz
FIDRES 0.284429 Hz
AQ 0.0946676 sec
RG 50.3
WF 92.400 usec
GB 6.50 usec
TE 299.15
CMT2 146.0000000
CMT11 -0.1000000
D0 0.0000300 sec
D1 1.0000000 sec
D2 0.00344928 sec
D4 0.0017454 sec
D11 0.0300000 sec
D14 0.0000000 sec
D21 0.0036000 sec
D24 0.0000000 sec
RG1 0.0002000 sec
LS 0
L31 1
TD0 2
----- CHANNEL f1 -----
NUC1 13
P1 6.00 usec
P2 13.60 usec
P28 0.00 usec
PUL 8.40 dB
PL2W 2.76302433 W
SFO1 600.216013 MHz
----- CHANNEL f2 -----
CFOPRG2 h1_gf04ep_4ep_2
NUC2 15N
P3 9.00 usec
P4 50.00 usec
P24 2000.00 usec
P31 1730.00 usec
P63 1200.00 usec
PL2 120.00 dB
PL22 -2.00 dB
PL12 14.48 dB
PL2W 0.0000000 W
PL2W 113.46054077 W
PL2W 2.3515976 W
SFO2 150.9450576 MHz
SFO3 7.07 MHz
SFO4 7.07 MHz
SFO8 8.00 MHz
SFO10 12.46 MHz
SFO11 14.58 MHz
SFOA03 Crp60, 0.5, 20.1
SFOA04 Crp60mm04
SFOA14 Crp37, 1.5, 20.2
SFOA19 Crp66_xf11c_2
SFOA21 Crp37, 1.5, 20.2
SFOA23 0.500
SFOA24 0.500
SFOA25 0.500
SFOA26 0.500
SFOA27 0.00 Hz
SFOA28 0.00 Hz
SFOA29 0.00 Hz
SFOA30 0.00 Hz
SFOA31 0.00 Hz
----- GRADIENT CHANNEL -----
SFOA01 SIME, 100
SFOA02 SIME, 100
SFOA03 SIME, 100
SFOA04 SIME, 100
SFO1 80.00 MHz
SFO2 20.10 MHz
SFO3 15.00 MHz
SFO4 1000.00 usec
SFO5 600.00 usec
TD 2
NUC 13
SFO1 150.9450 MHz
SFO2 193.353592 Hz
SFO3 105.658 ppm
SFO4 Echo-AntiEcho
SI 1024
SF 600.2505187 MHz
WDM 2
SFO 2
LB 0.00 Hz
GB 0
PC 1.00
SI 1024
MC2 echo-antiEcho
SF 150.9327488 MHz
WDM 2
SFO 2
LB 0.00 Hz
GB 0
  
```

Figure S4. HMBC spectrum of cryptocaryol A (1) in CD<sub>3</sub>OD.

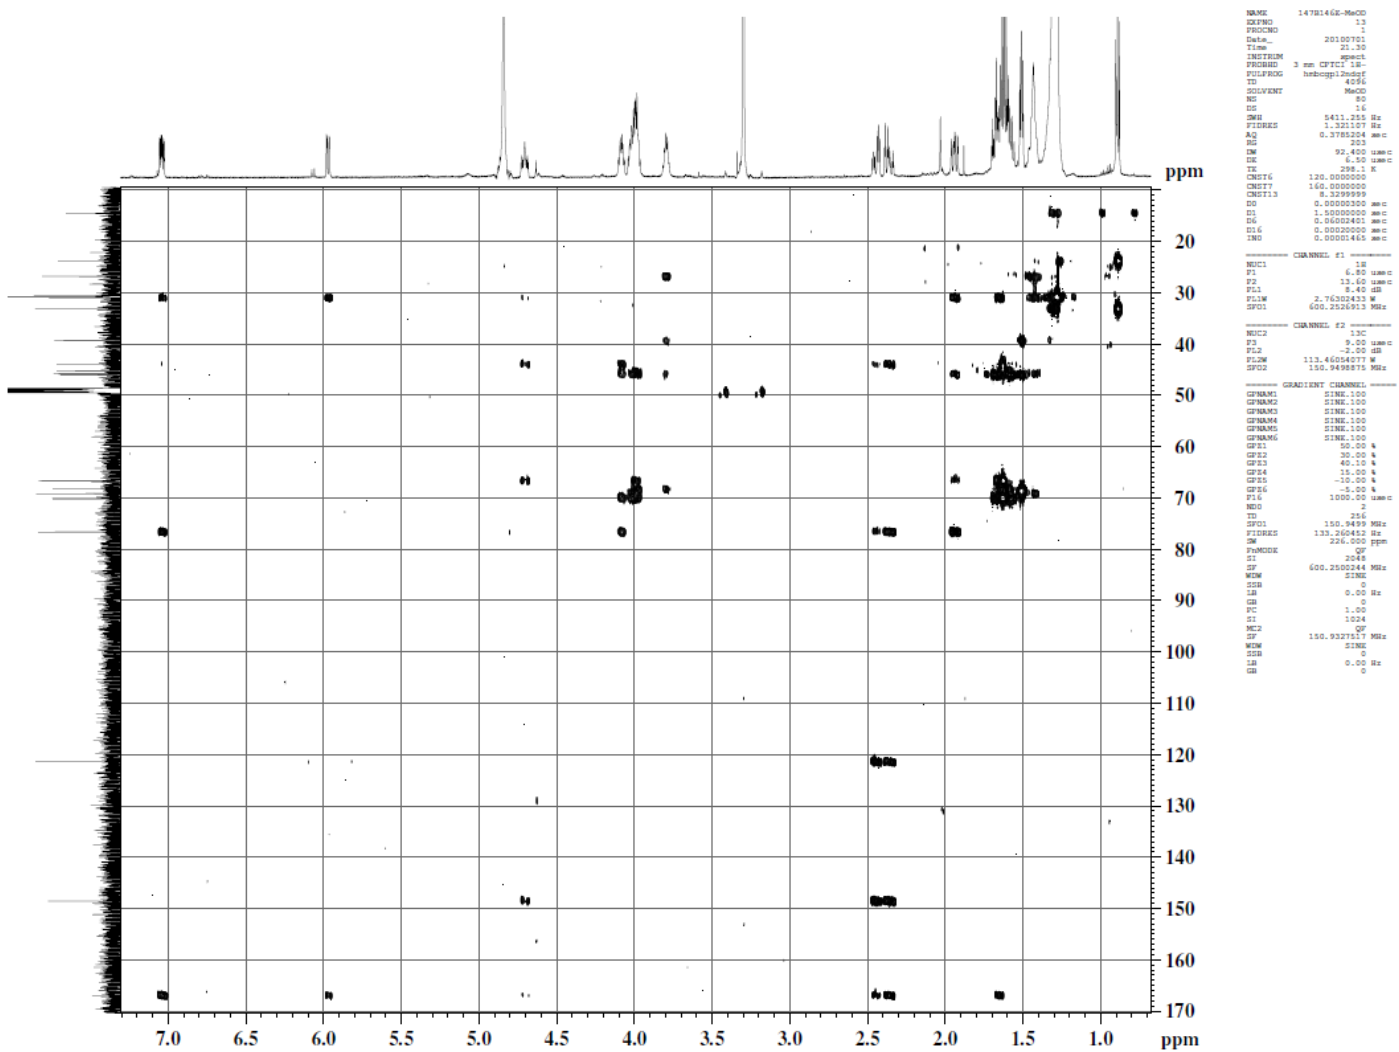

**Figure S5.** LRLCMS spectra of cryptocaryol A (1).

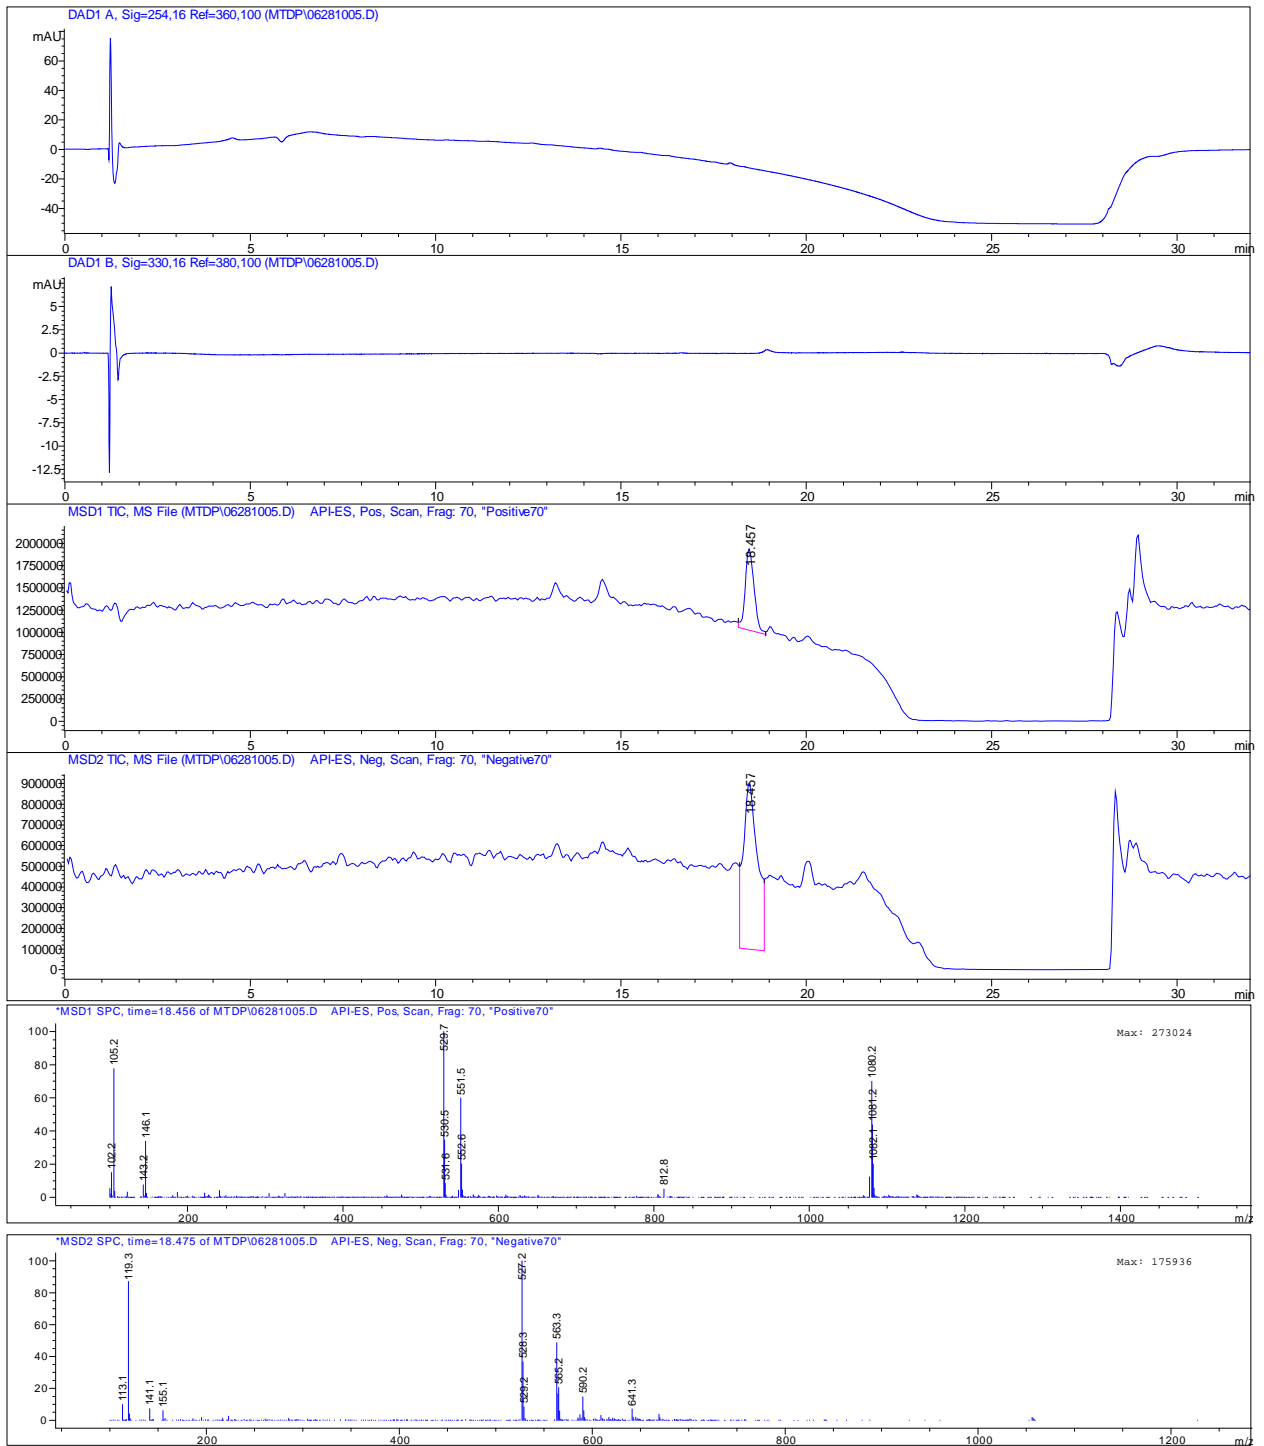



**Figure S6.** HRESIMS spectrum of cryptocaryol A (**1**).

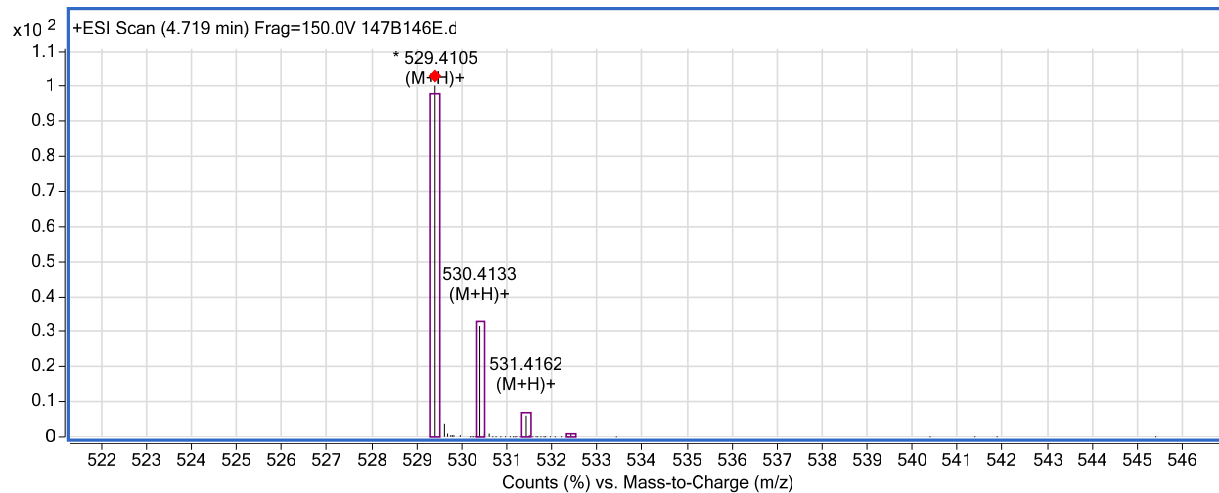

**Figure S7.** HRESIMS/MS spectra of cryptocaryol A (**1**).

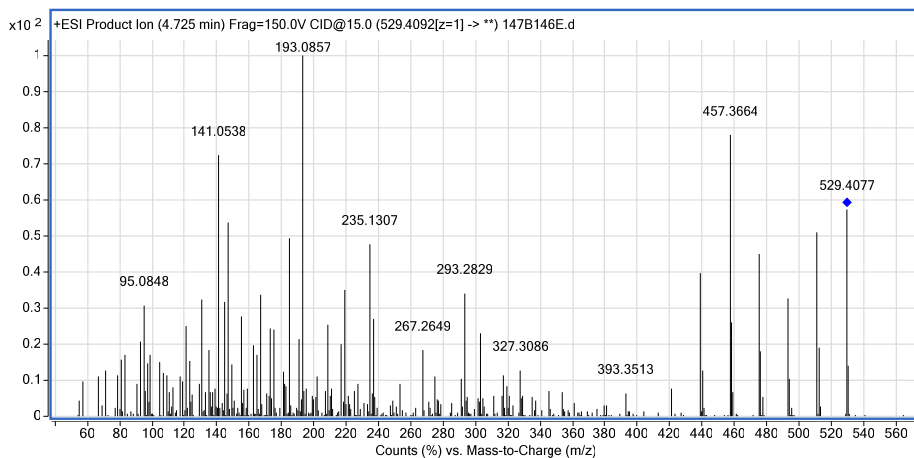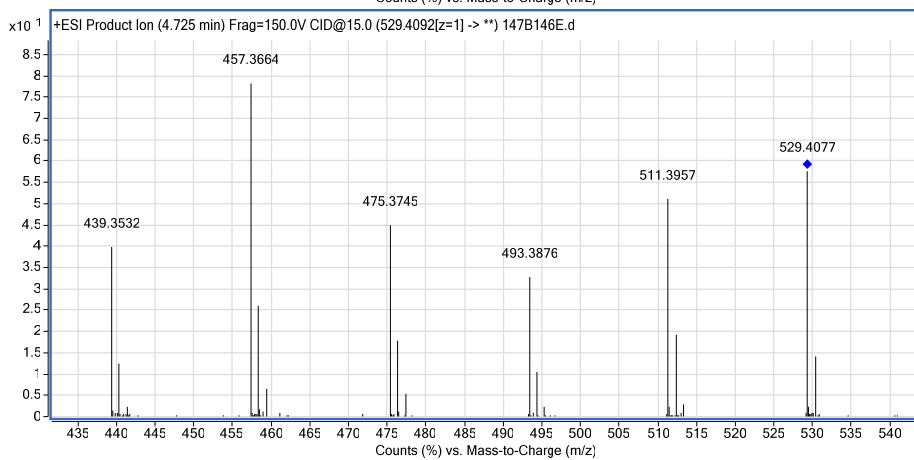

**Figure S8.**  $^1\text{H}$  NMR spectrum of cryptocaryol B (**2**) in  $\text{CD}_3\text{OD}$ .

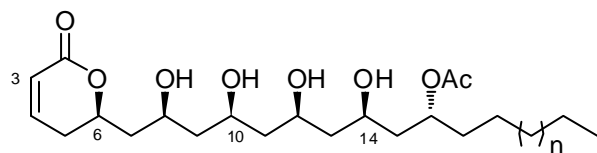

Cryptocaryol B (**2**)  $n=11$

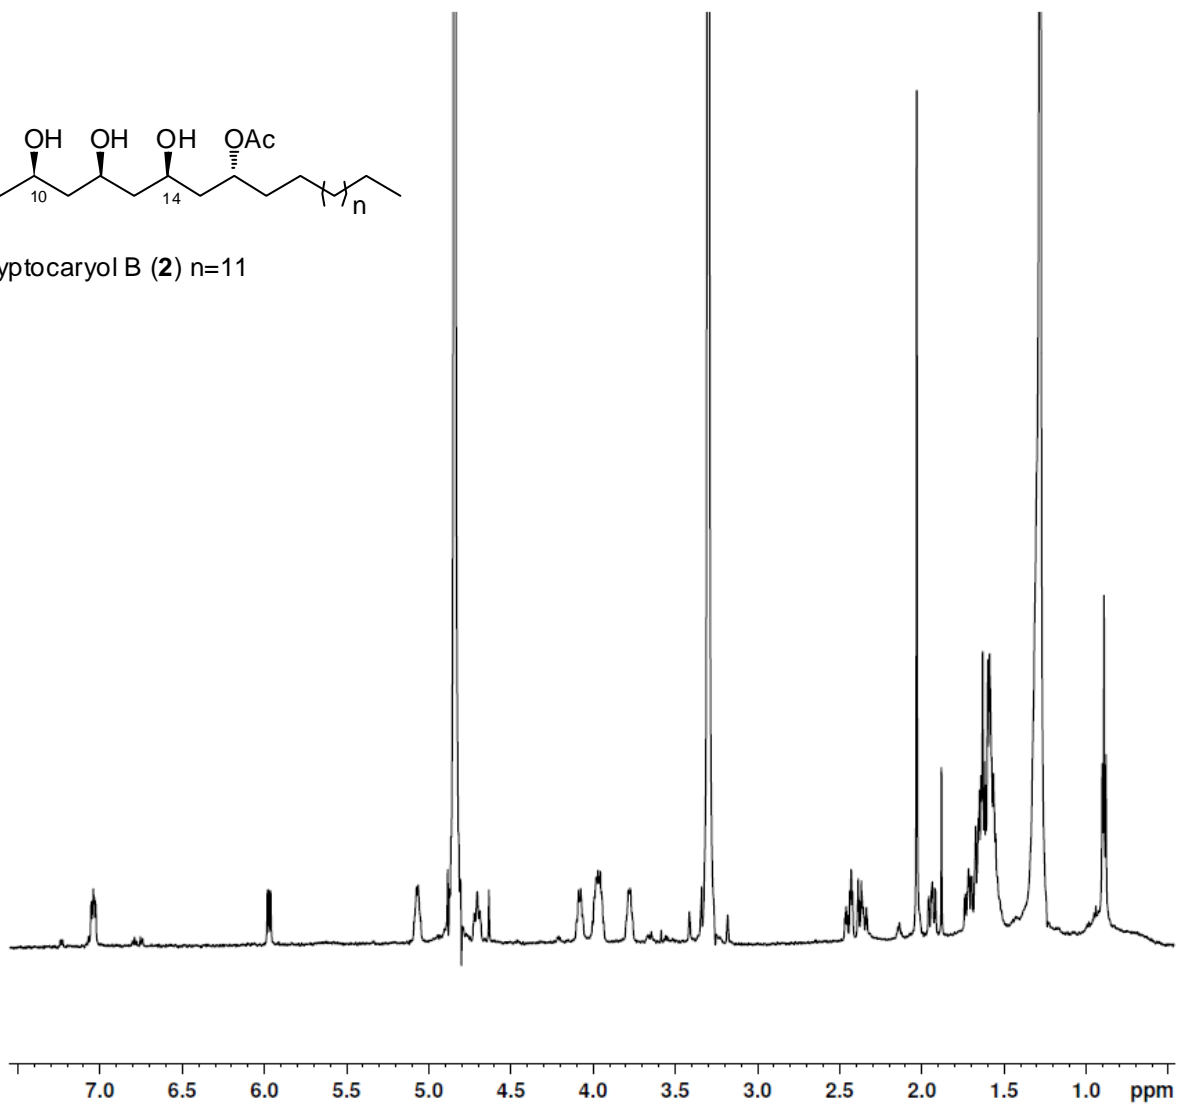

```
NAME      147B147G-MeOD
EXPNO     1
PROCNO    1
Date_     20100702
Time      14.42
INSTRUM   spect
PROBHD    3 mm CPTCI 1H-
PULPROG   zg
TD         32768
SOLVENT   MeOD
NS         4
DS         2
SWH       8417.509 Hz
FIDRES    0.256882 Hz
AQ        1.9464692 sec
RG         10
DW        59.400 use
DE         9.00 use
TE        298.1 K
D1        1.00000000 sec
TDO       1
```

```
===== CHANNEL f1 =====
NUC1      1H
P1        6.00 use
PL1       8.40 dB
PL1W      2.76302433 W
SFO1     600.2533014 MHz
SI        32768
SF        600.2500219 MHz
WDW       EM
SSB       0
LB        1.00 Hz
GB         0
PC        1.00
```

**Figure S9.**  $^{13}\text{C}$  NMR spectrum of cryptocaryol B (**2**) in  $\text{CD}_3\text{OD}$ .

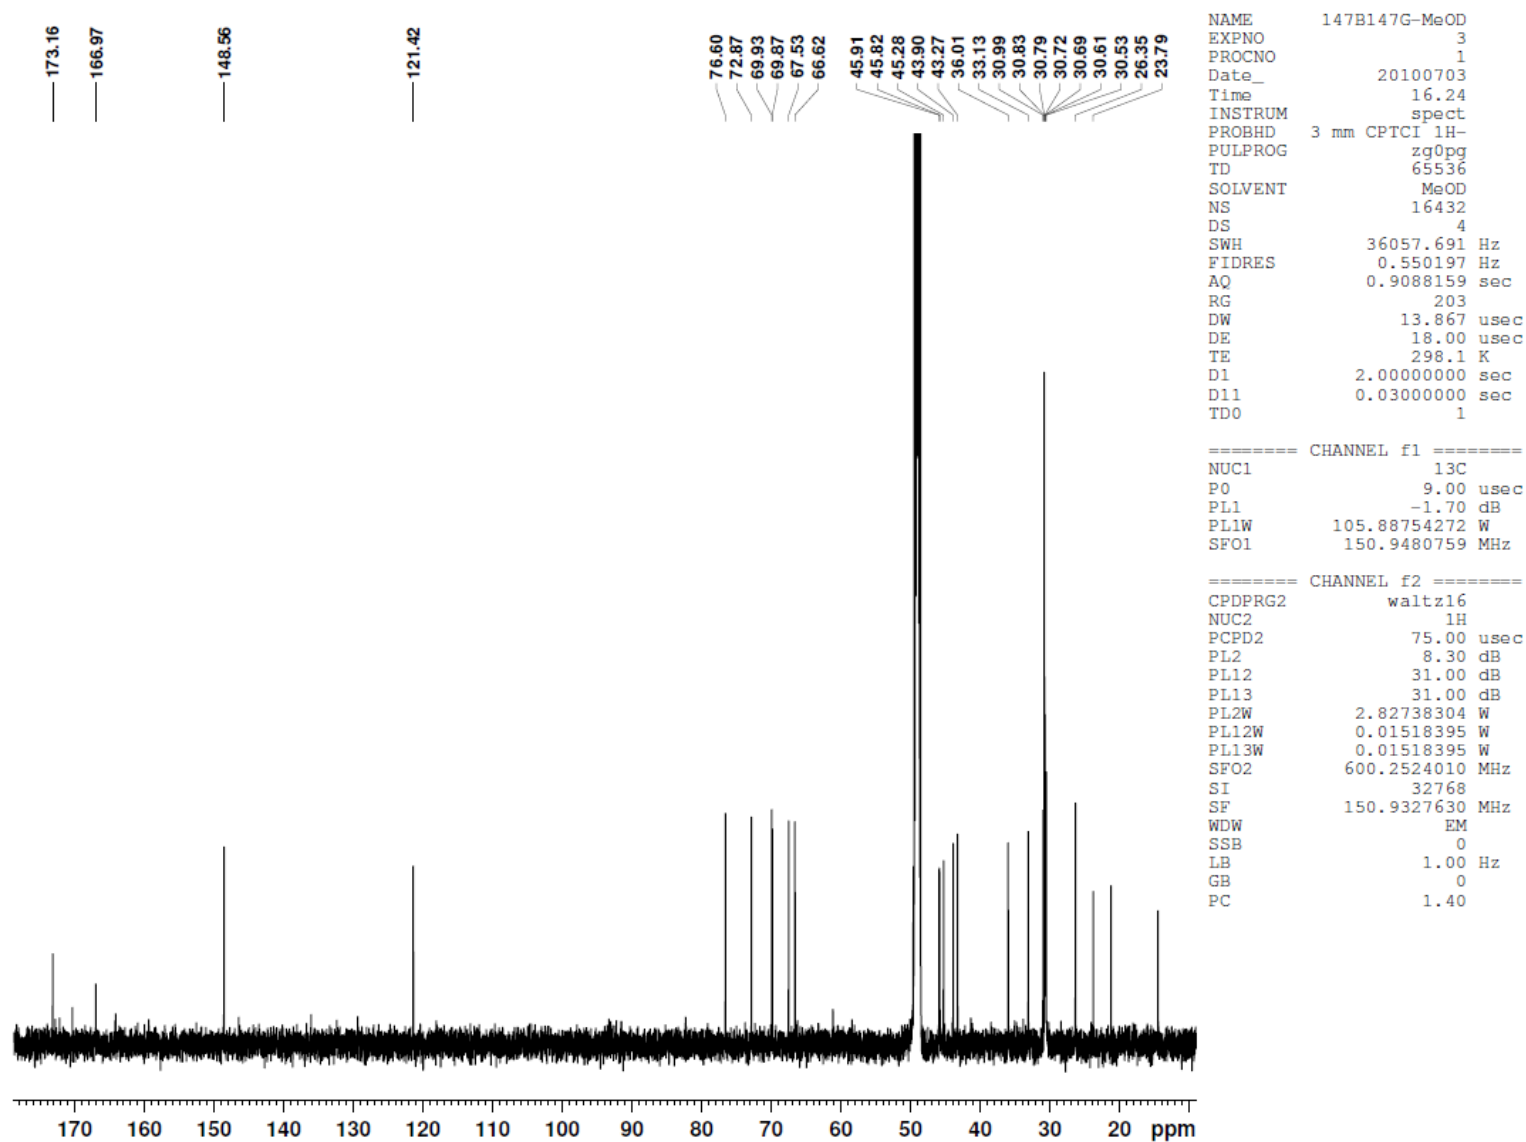

**Figure S10.** LRLCMS spectra of cryptocaryol B (2).

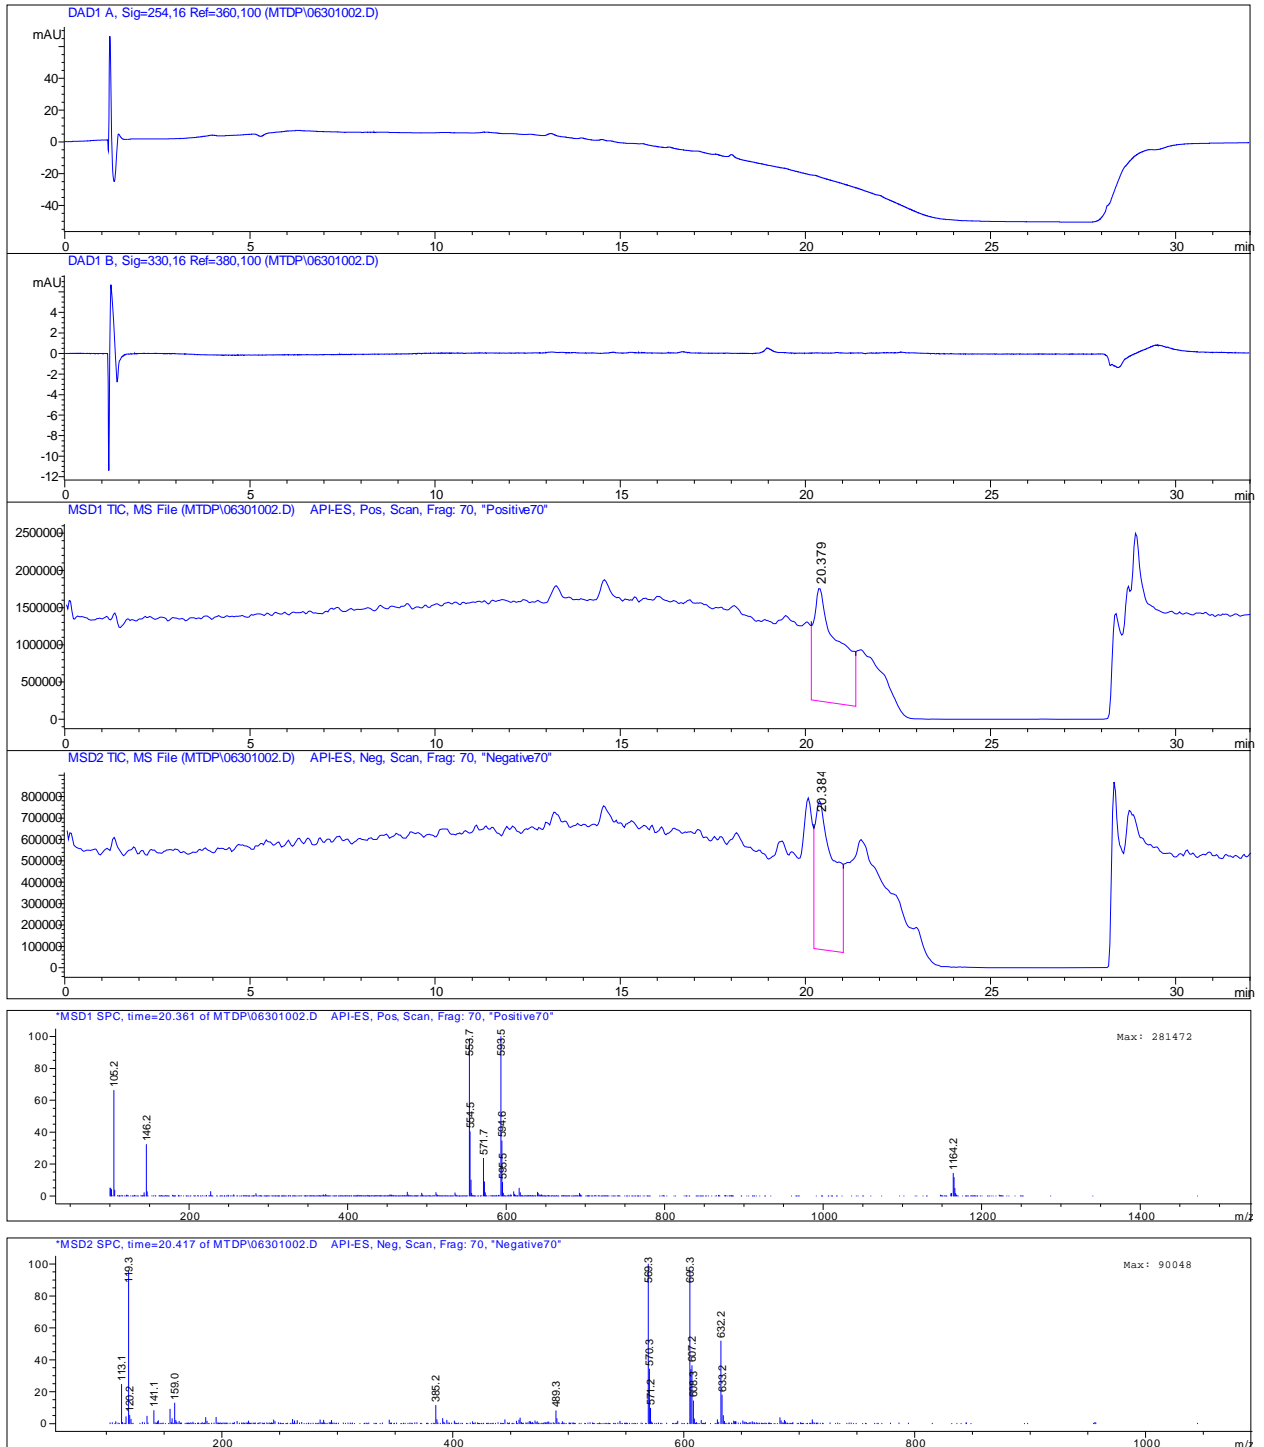

**Figure S11.** HRESIMS spectrum of cryptocaryol B (2).

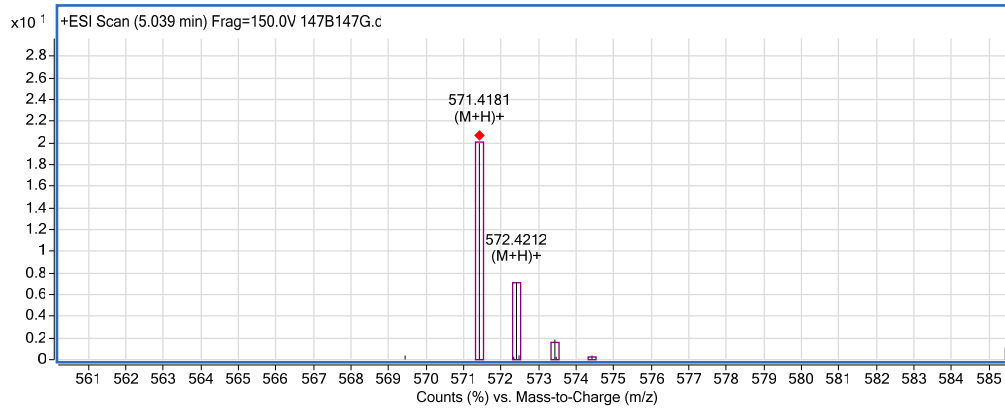

**Figure S12.** HRESIMS/MS spectrum of cryptocaryol B (2).

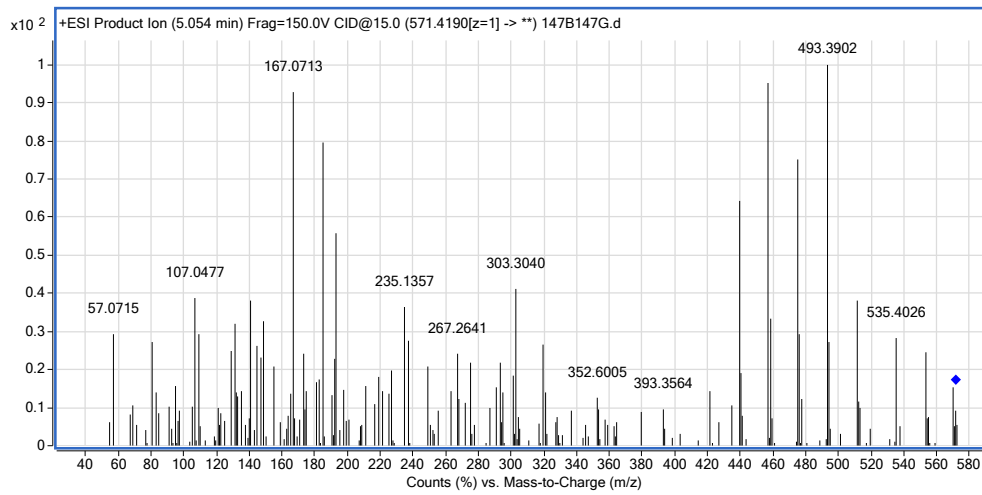

**Figure S13.**  $^1\text{H}$  NMR spectrum of cryptocaryol C (**3**) in  $\text{CD}_3\text{OD}$ .

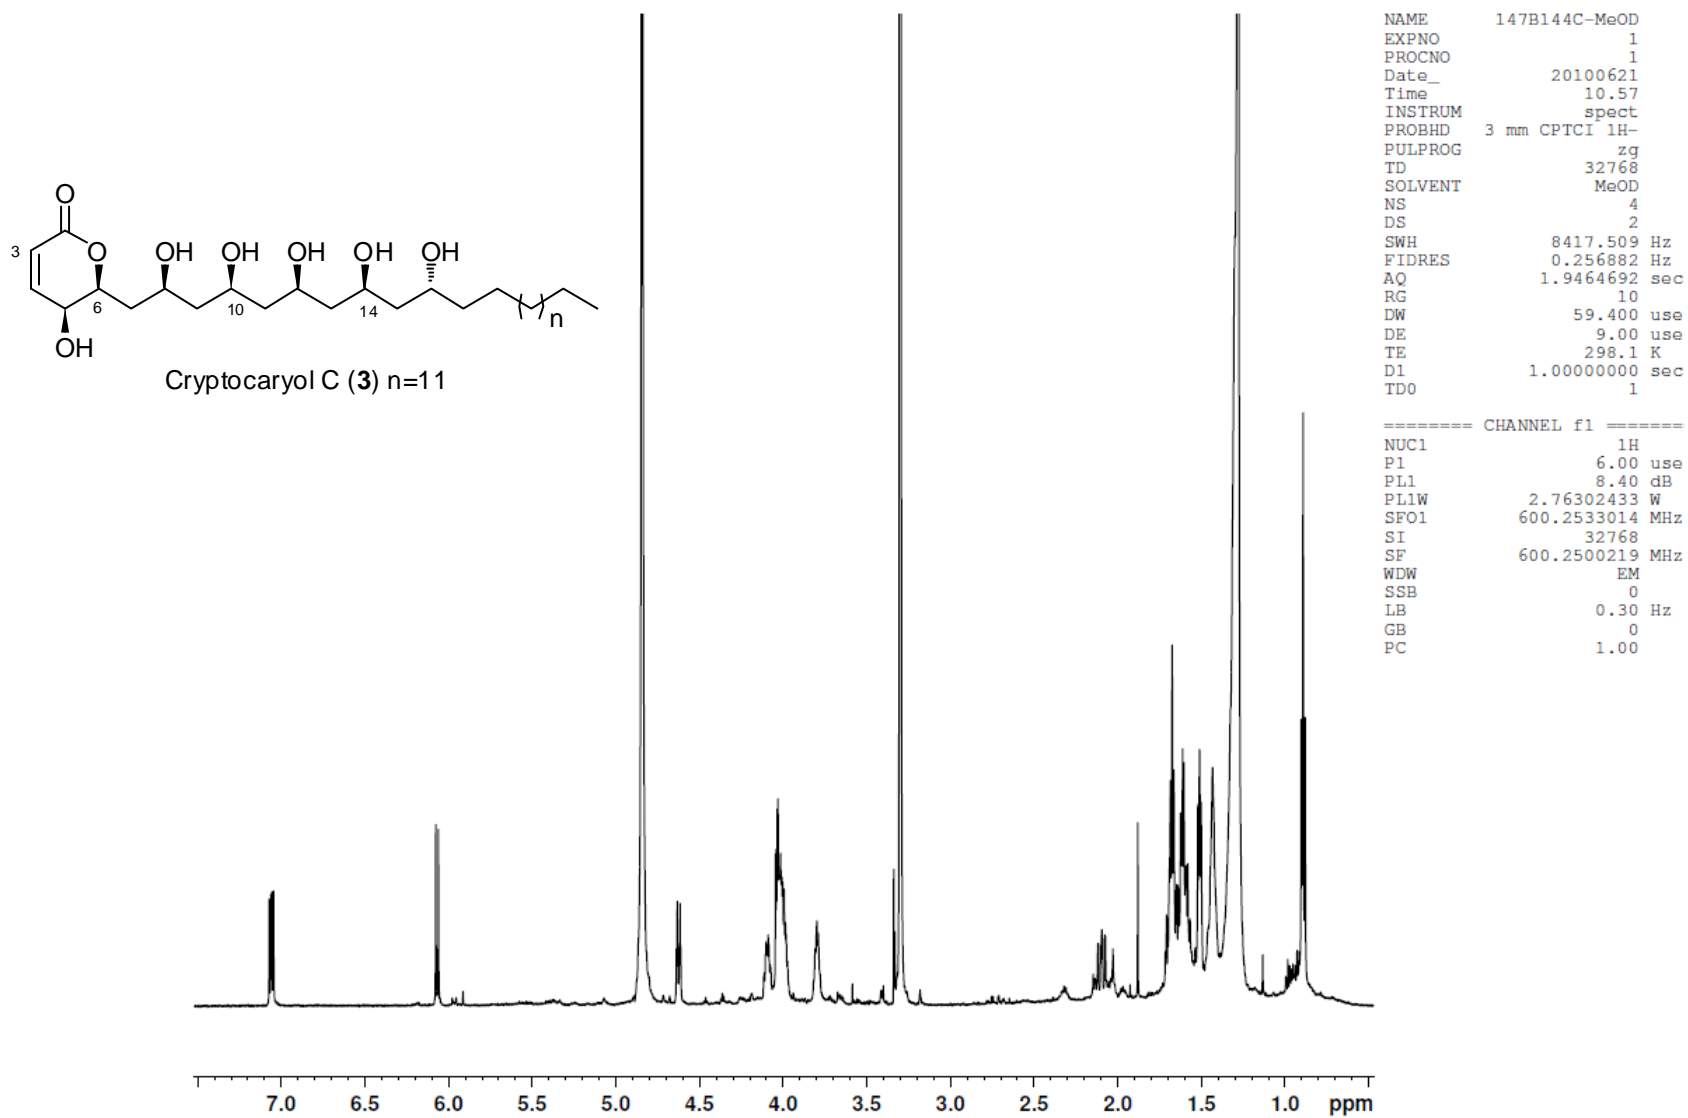

**Figure S14.**  $^{13}\text{C}$  NMR spectrum of cryptocaryol C (**3**) in  $\text{CD}_3\text{OD}$ .

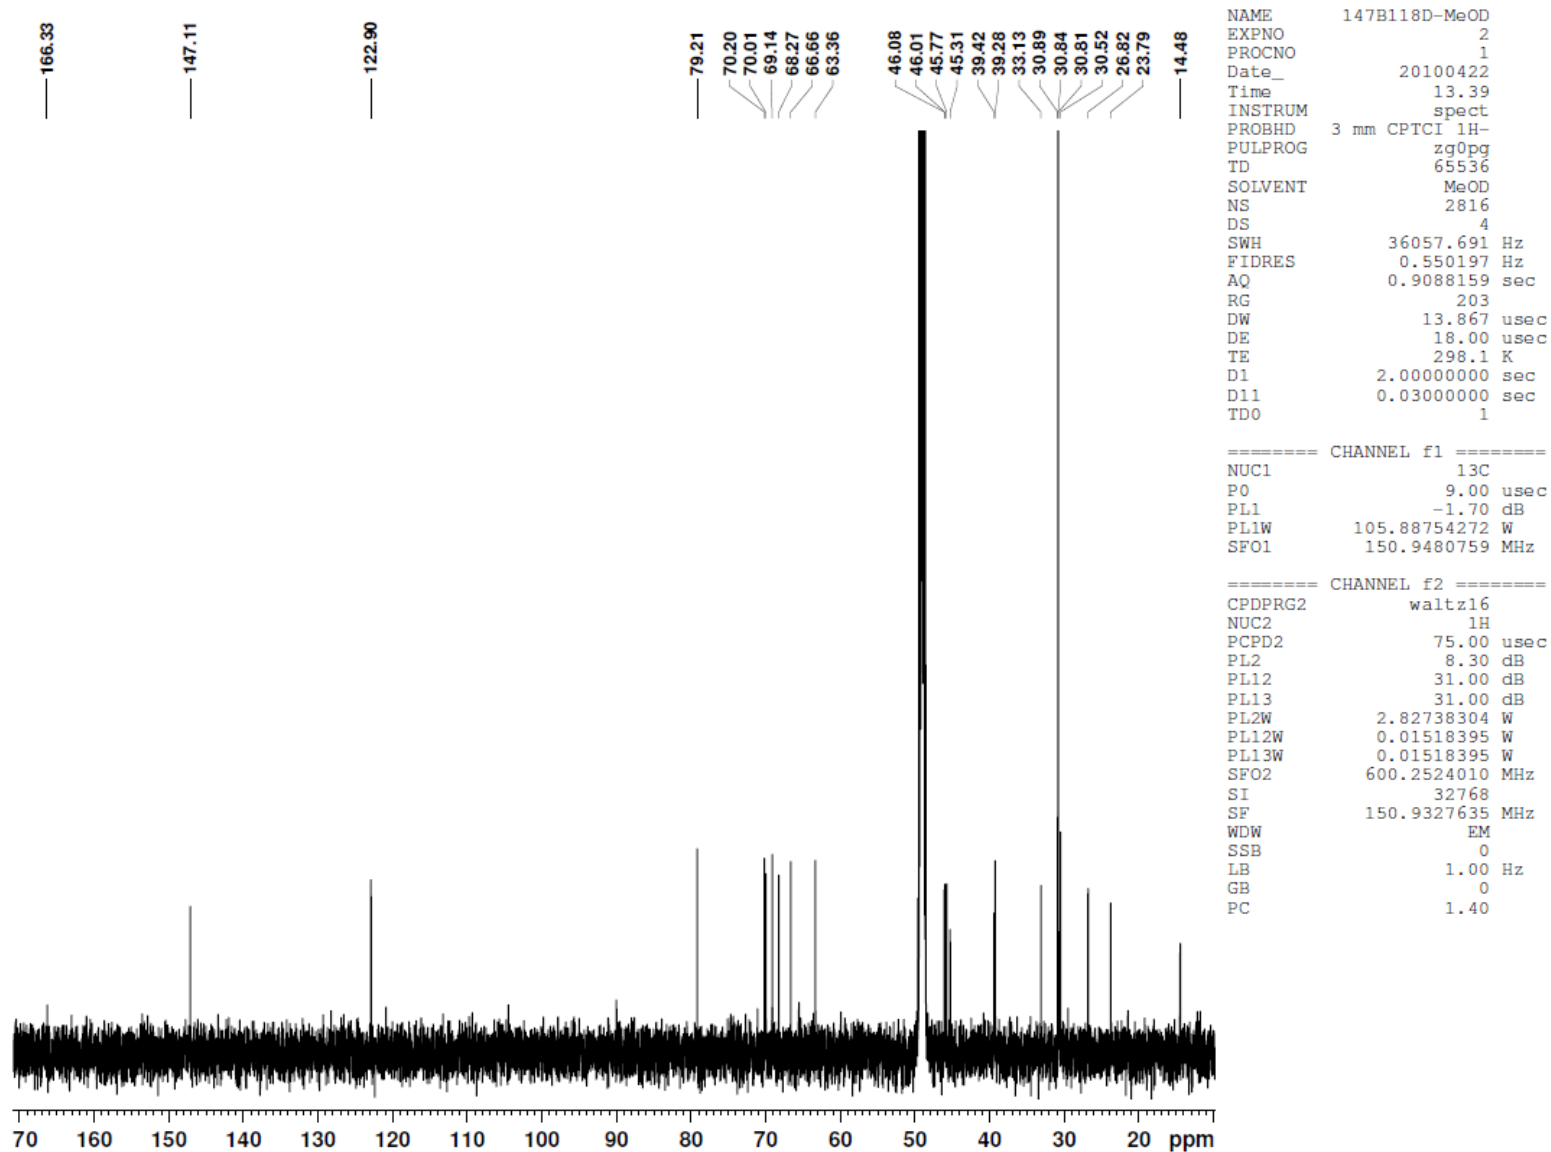

**Figure S15.** LRLCMS spectra of cryptocaryol C (3).

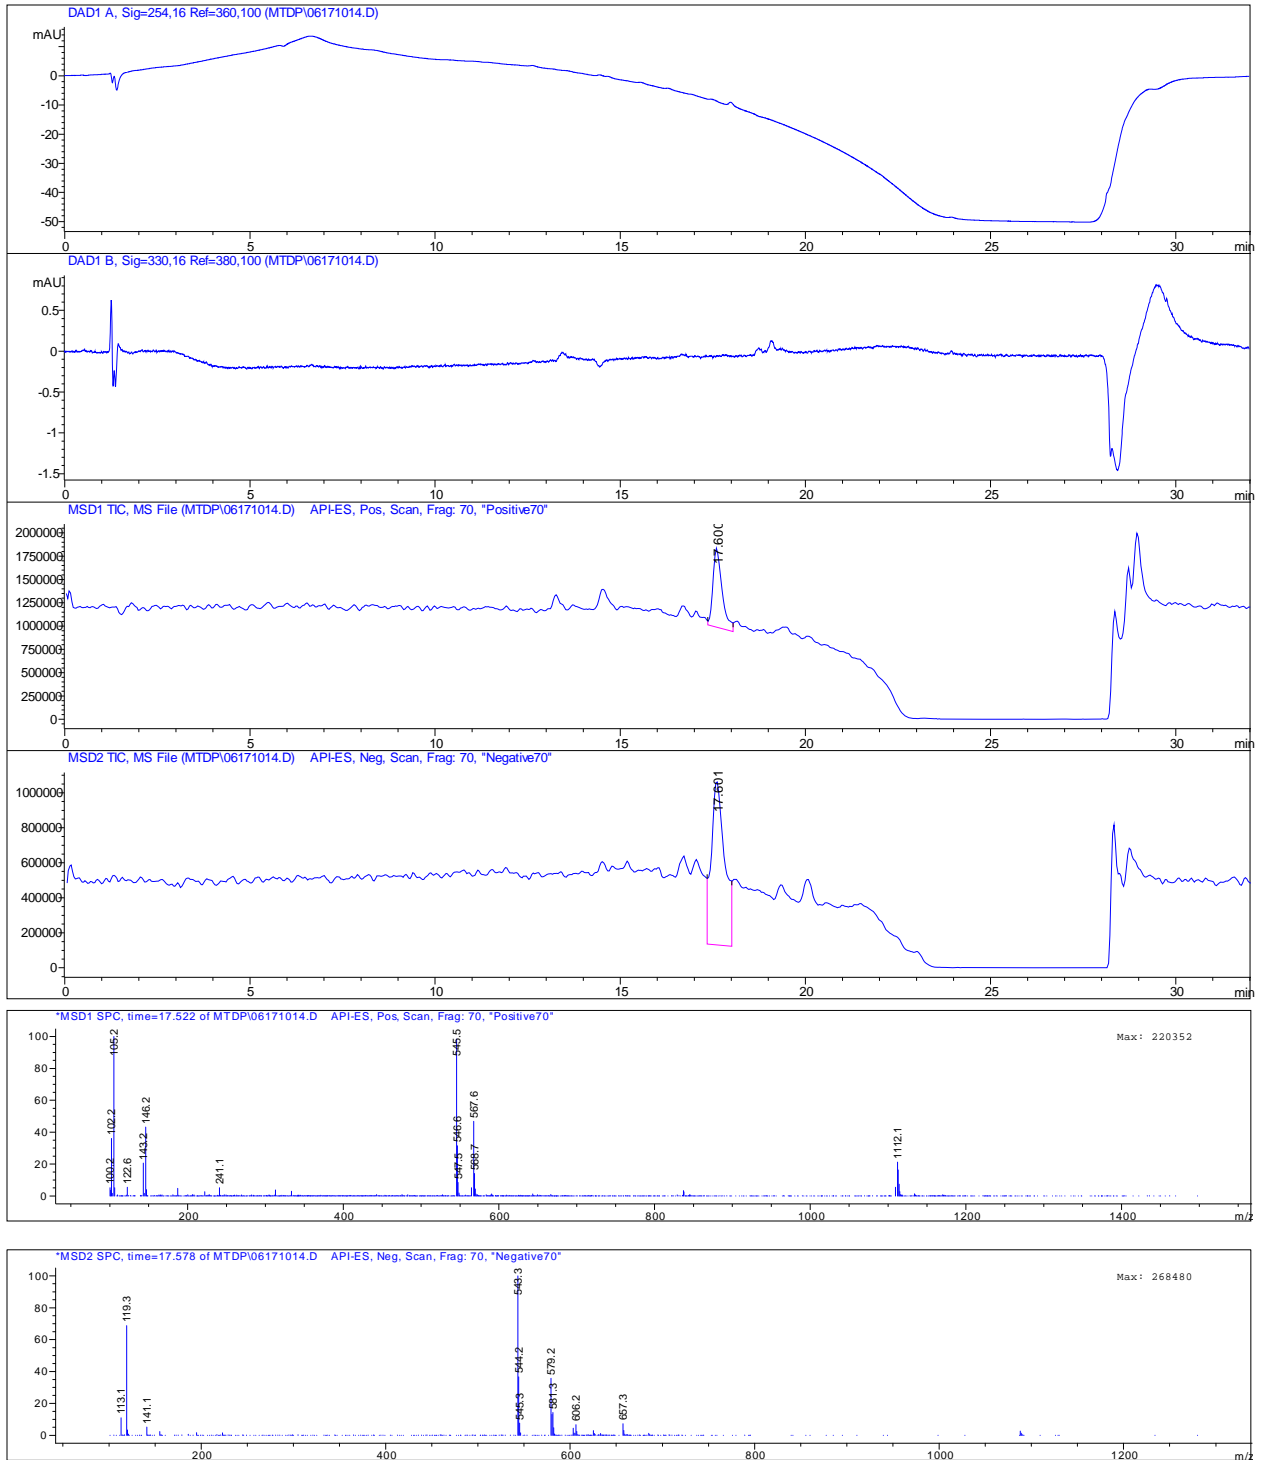



**Figure S16.** HRESIMS spectrum of cryptocaryol C (**3**).

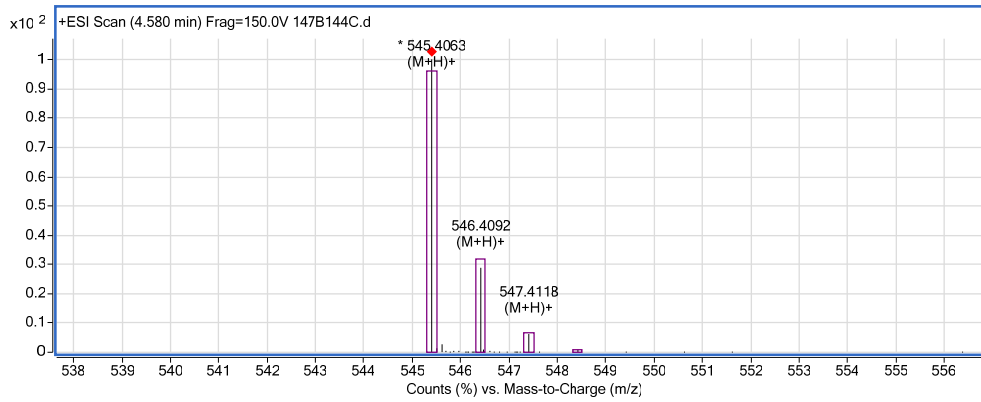

**Figure S17.** HRESIMS/MS spectra of cryptocaryol C (**3**).

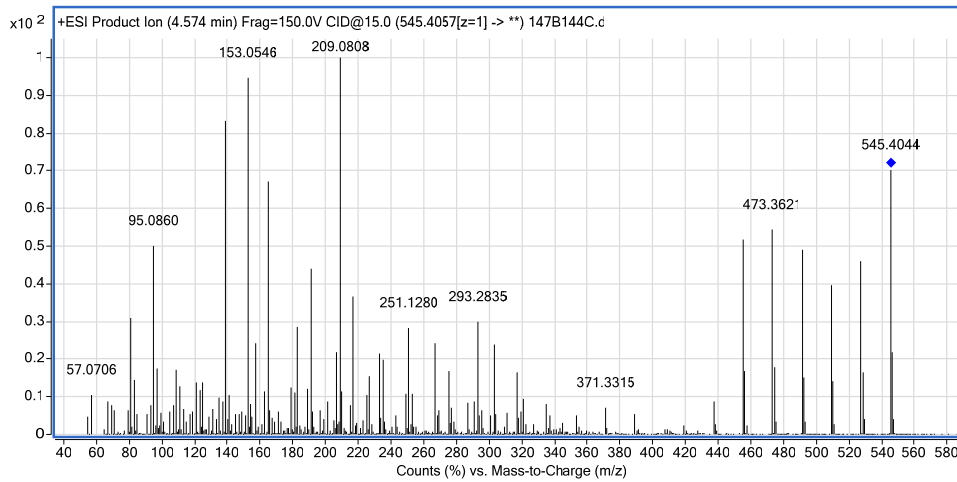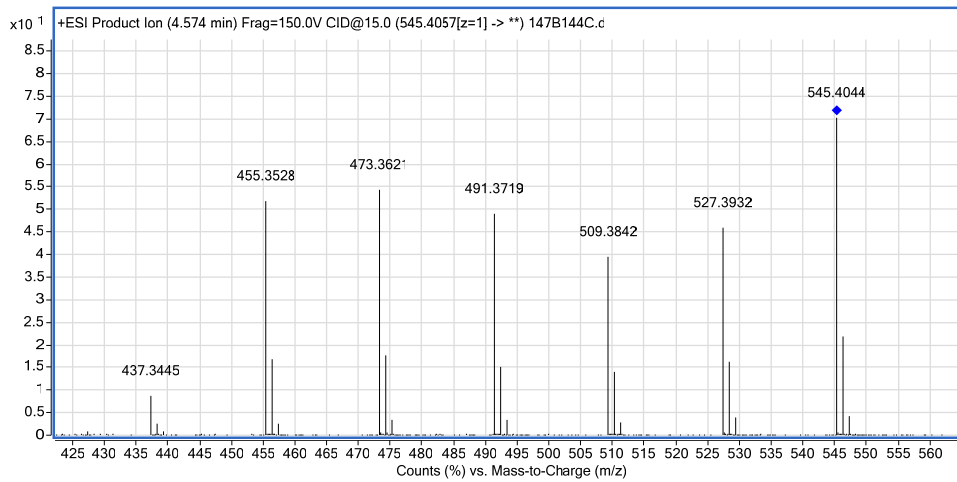

**Figure S18.**  $^1\text{H}$  NMR spectrum of cryptocaryol D (**4**) in  $\text{CD}_3\text{OD}$ .

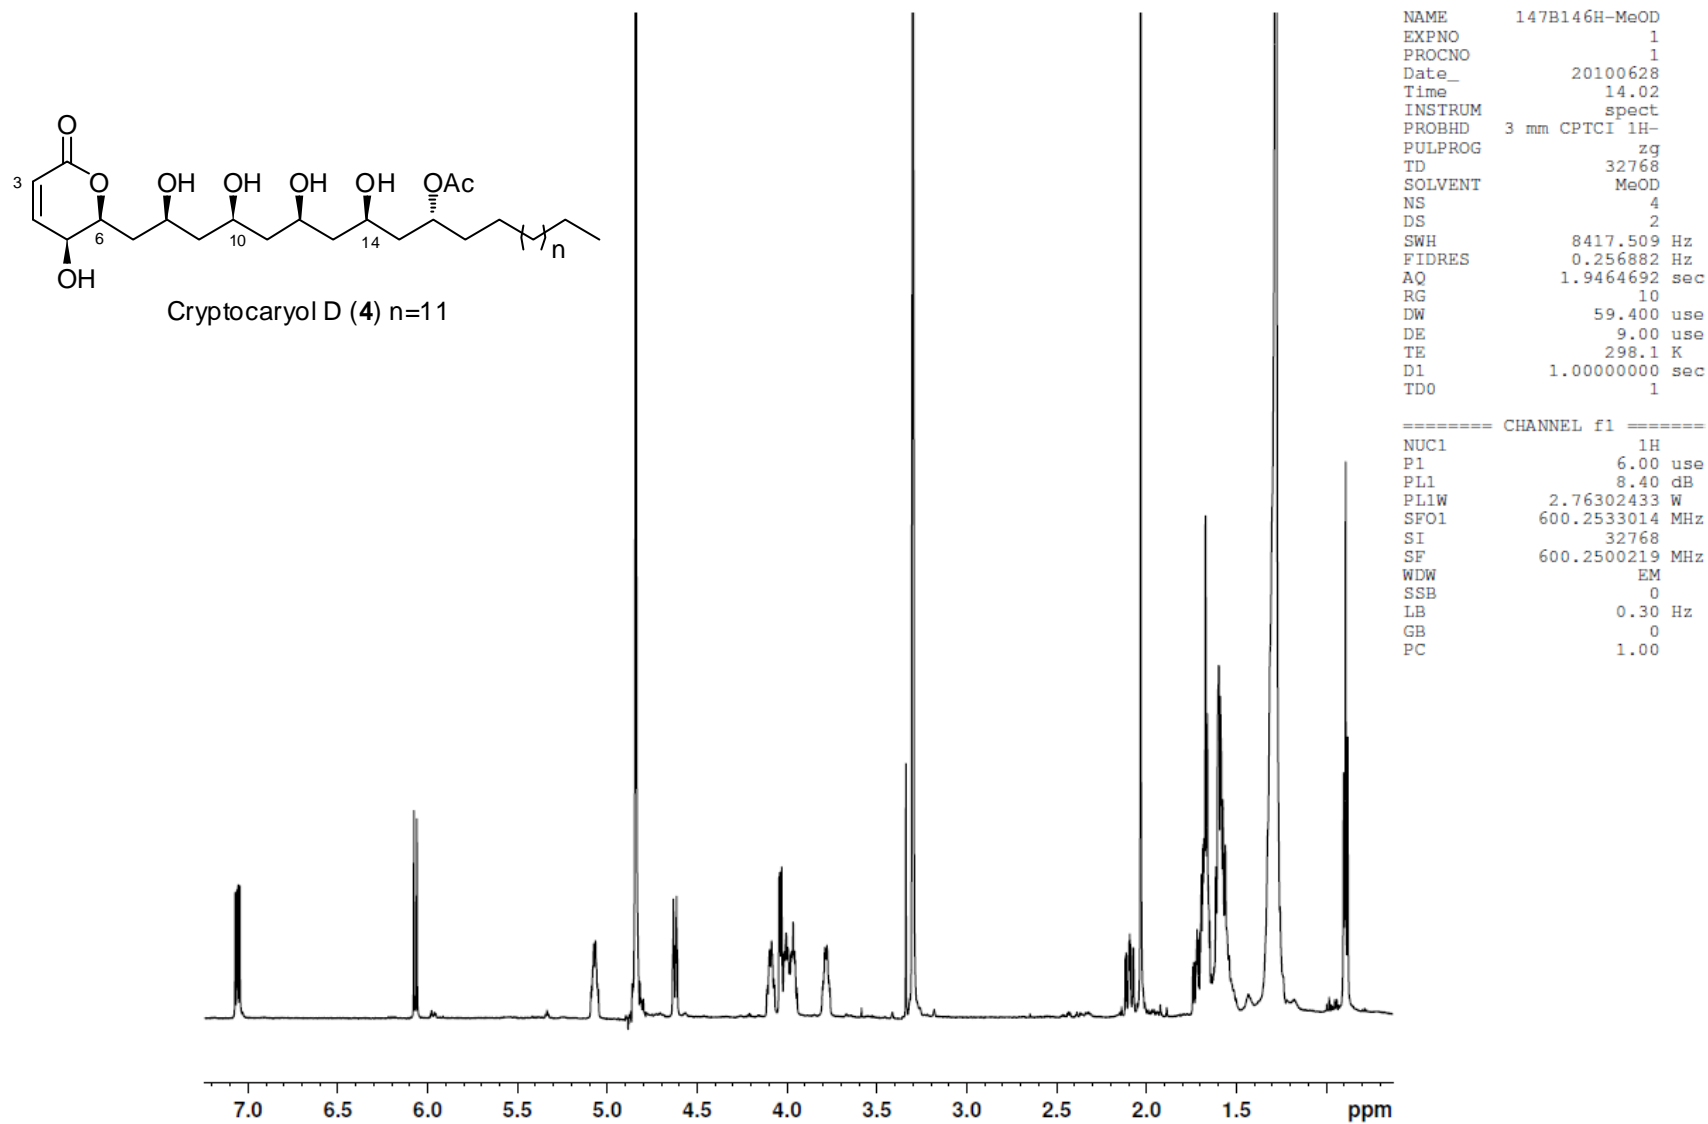

**Figure S19.**  $^{13}\text{C}$  NMR spectrum of cryptocaryol D (**4**) in  $\text{CD}_3\text{OD}$ .

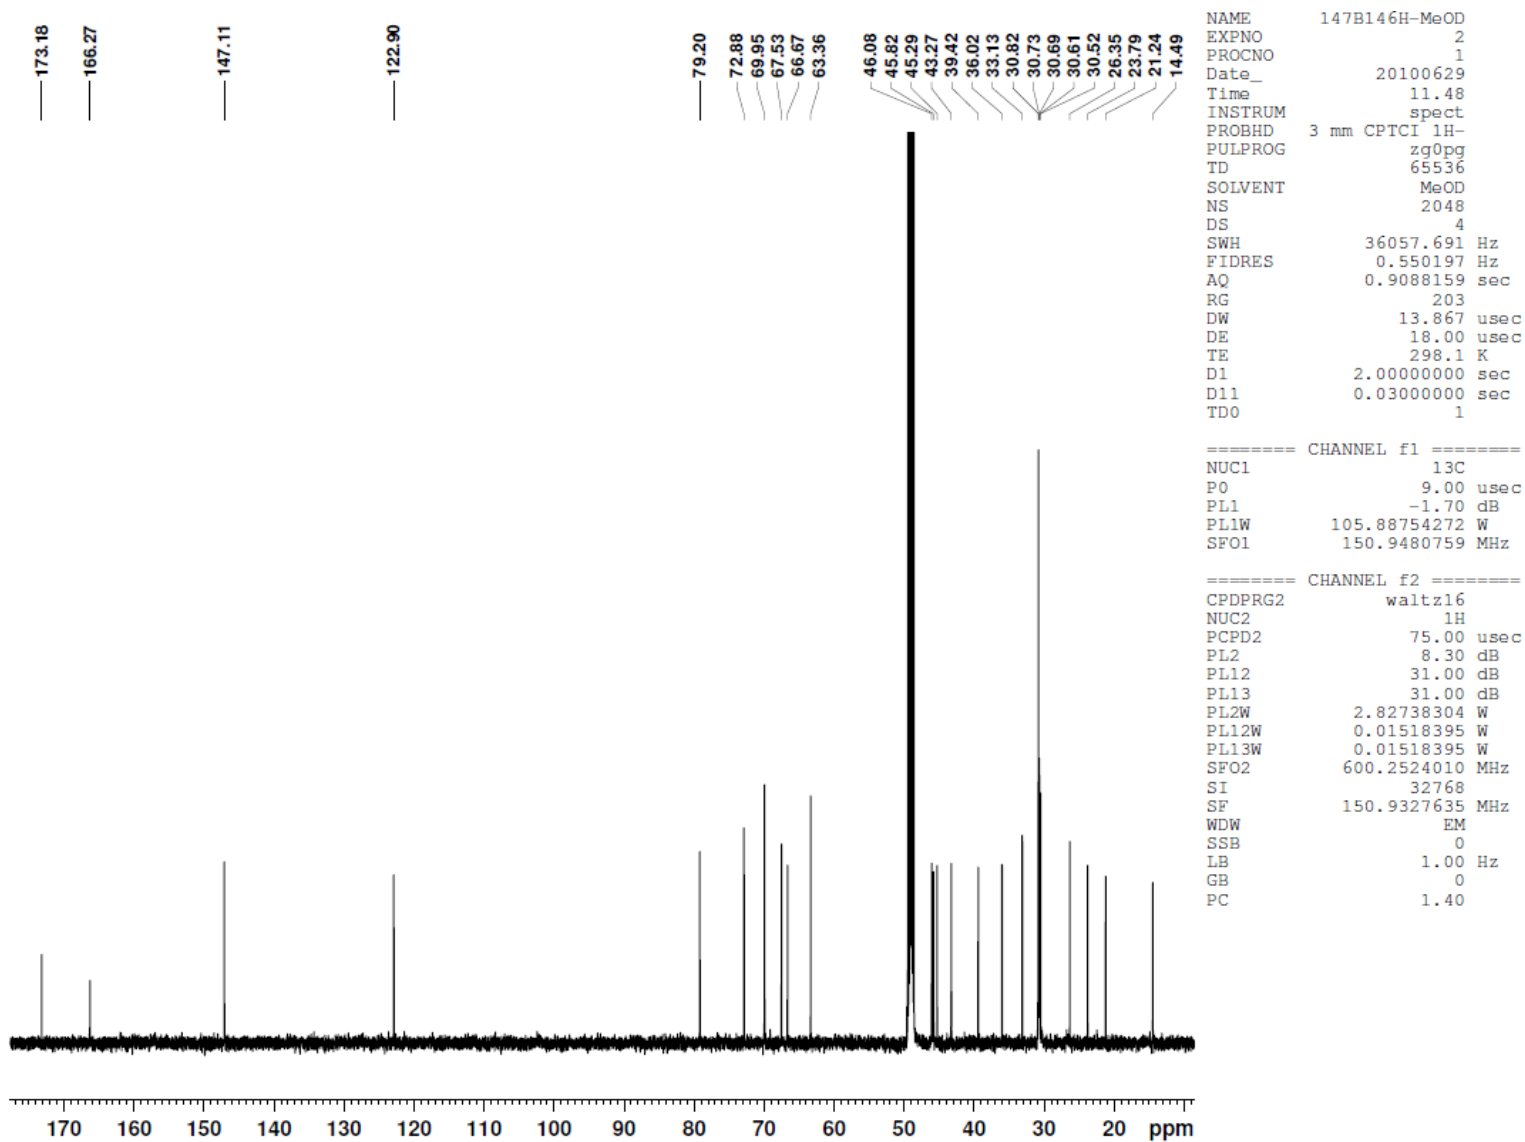

**Figure S20.** LRLCMS spectra of cryptocaryol C (4).

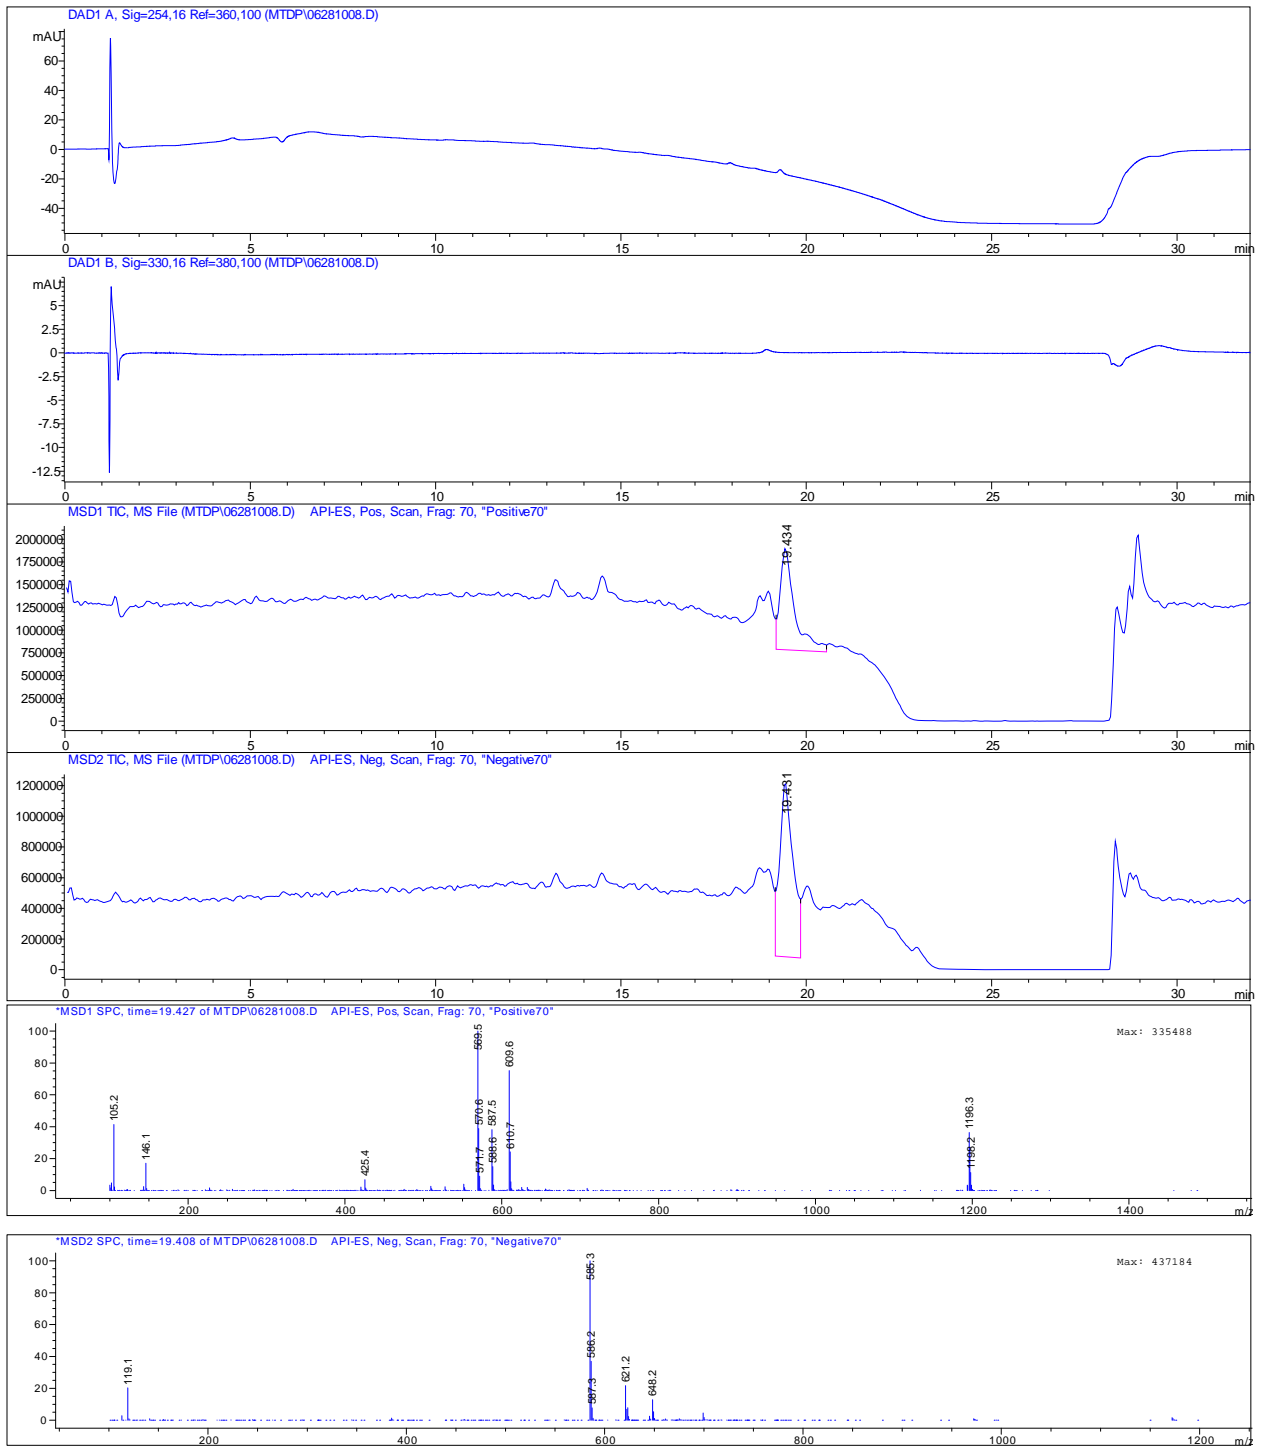

**Figure S21.** HRESIMS spectrum of cryptocaryol D (**4**).

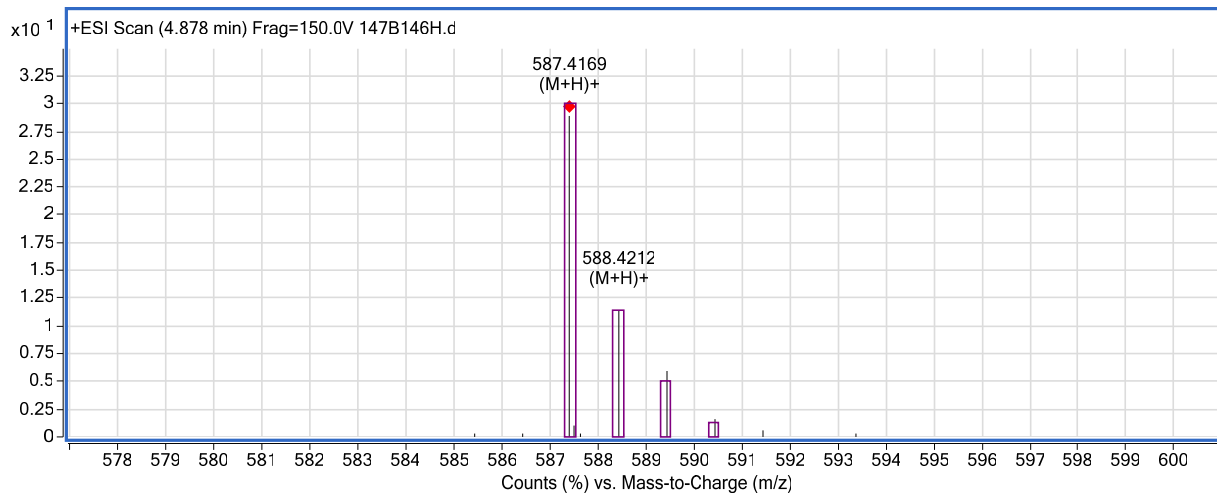

**Figure S22.** HRESIMS/MS spectrum of cryptocaryol D (**4**).

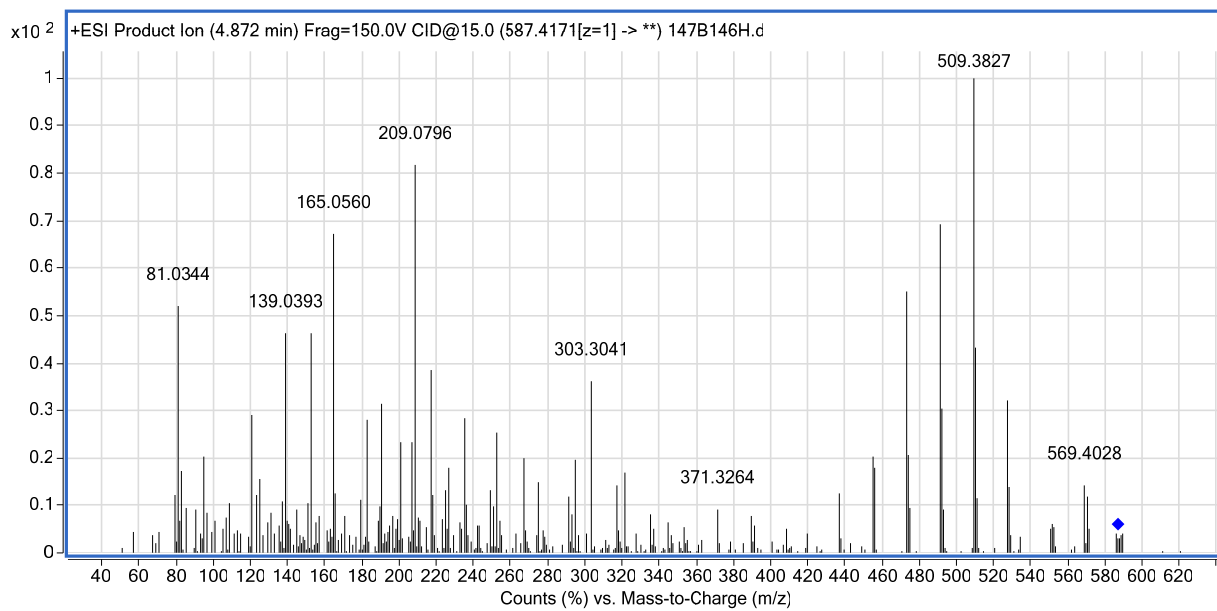

**Figure S23.**  $^1\text{H}$  NMR spectrum of cryptocaryol E (5) in  $\text{CD}_3\text{OD}$ .

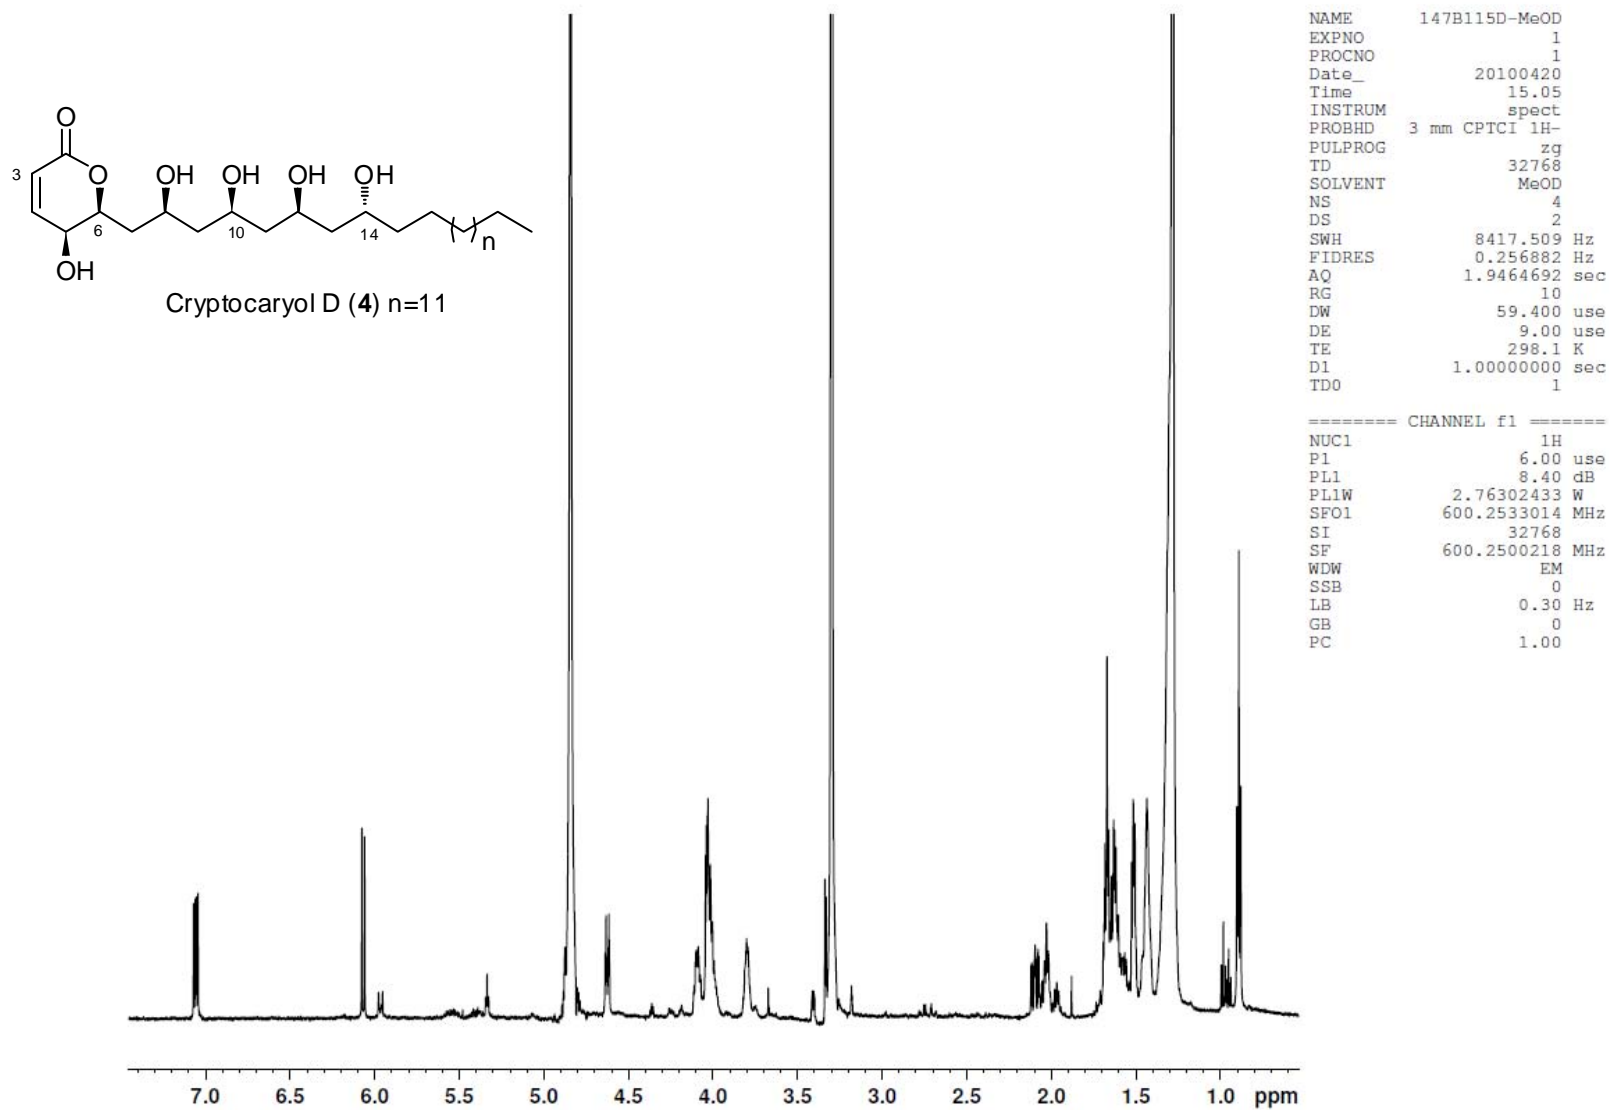

**Figure S24.**  $^{13}\text{C}$  NMR spectrum of cryptocaryol E (**5**) in  $\text{CD}_3\text{OD}$ .

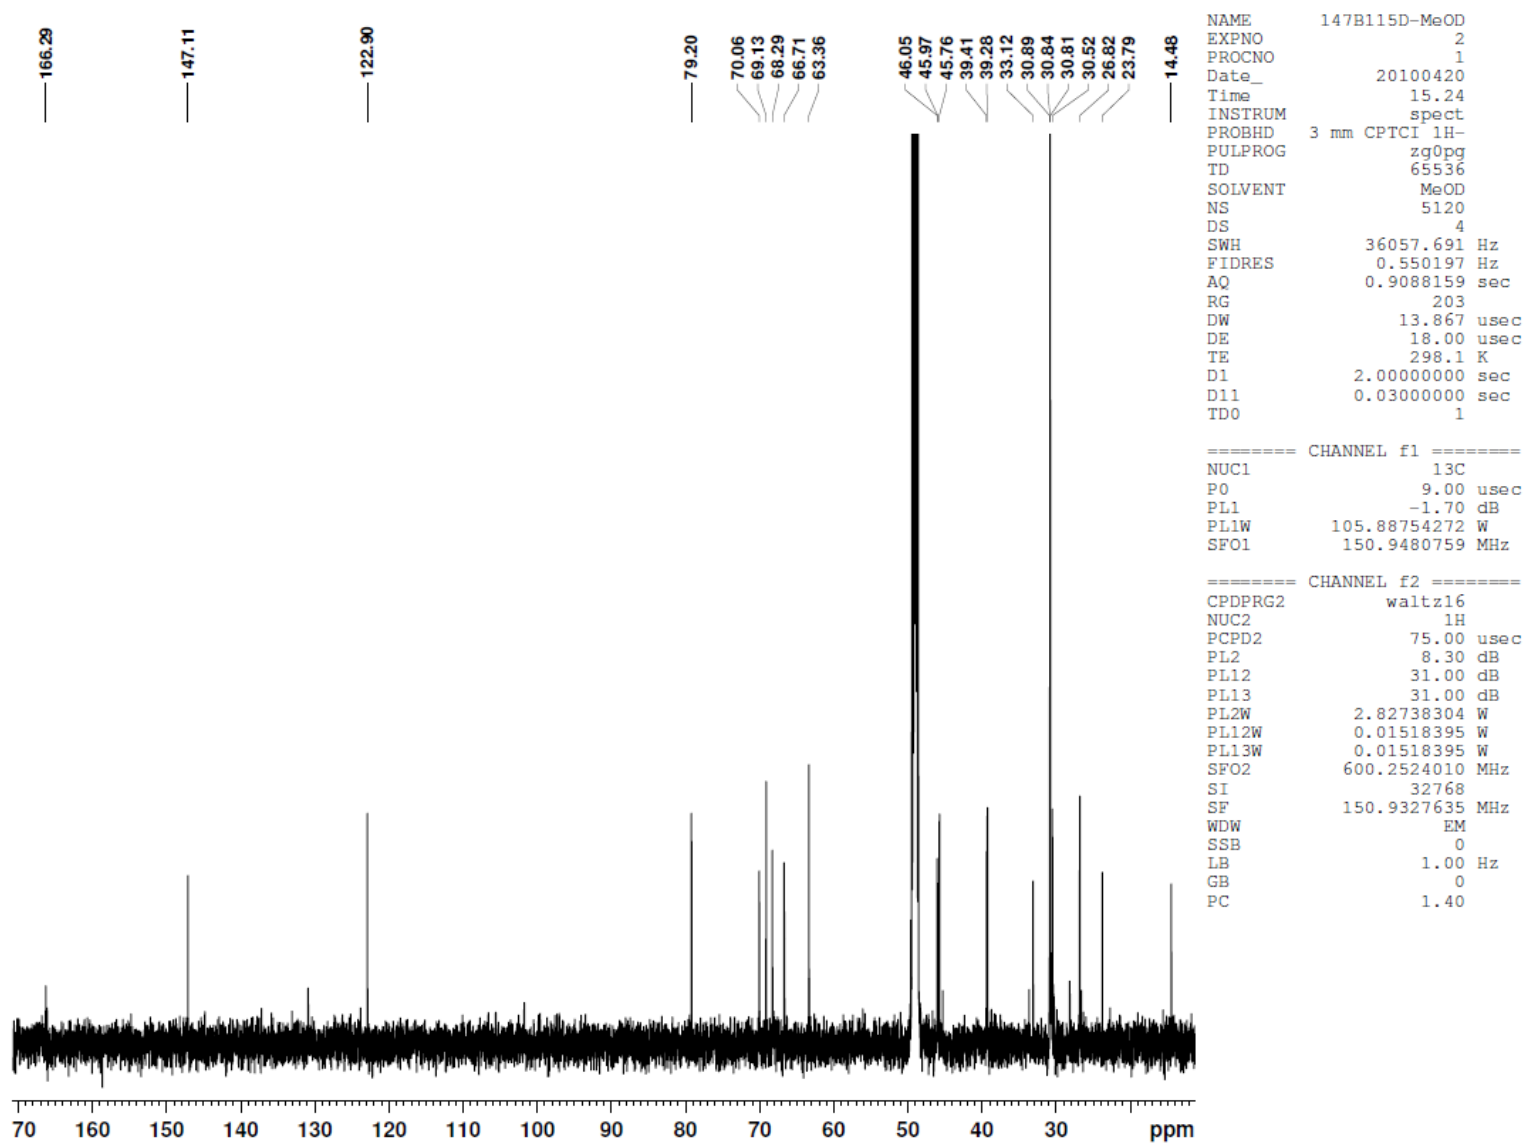

**Figure S25.** LRLCMS spectra of cryptocaryol E (5).

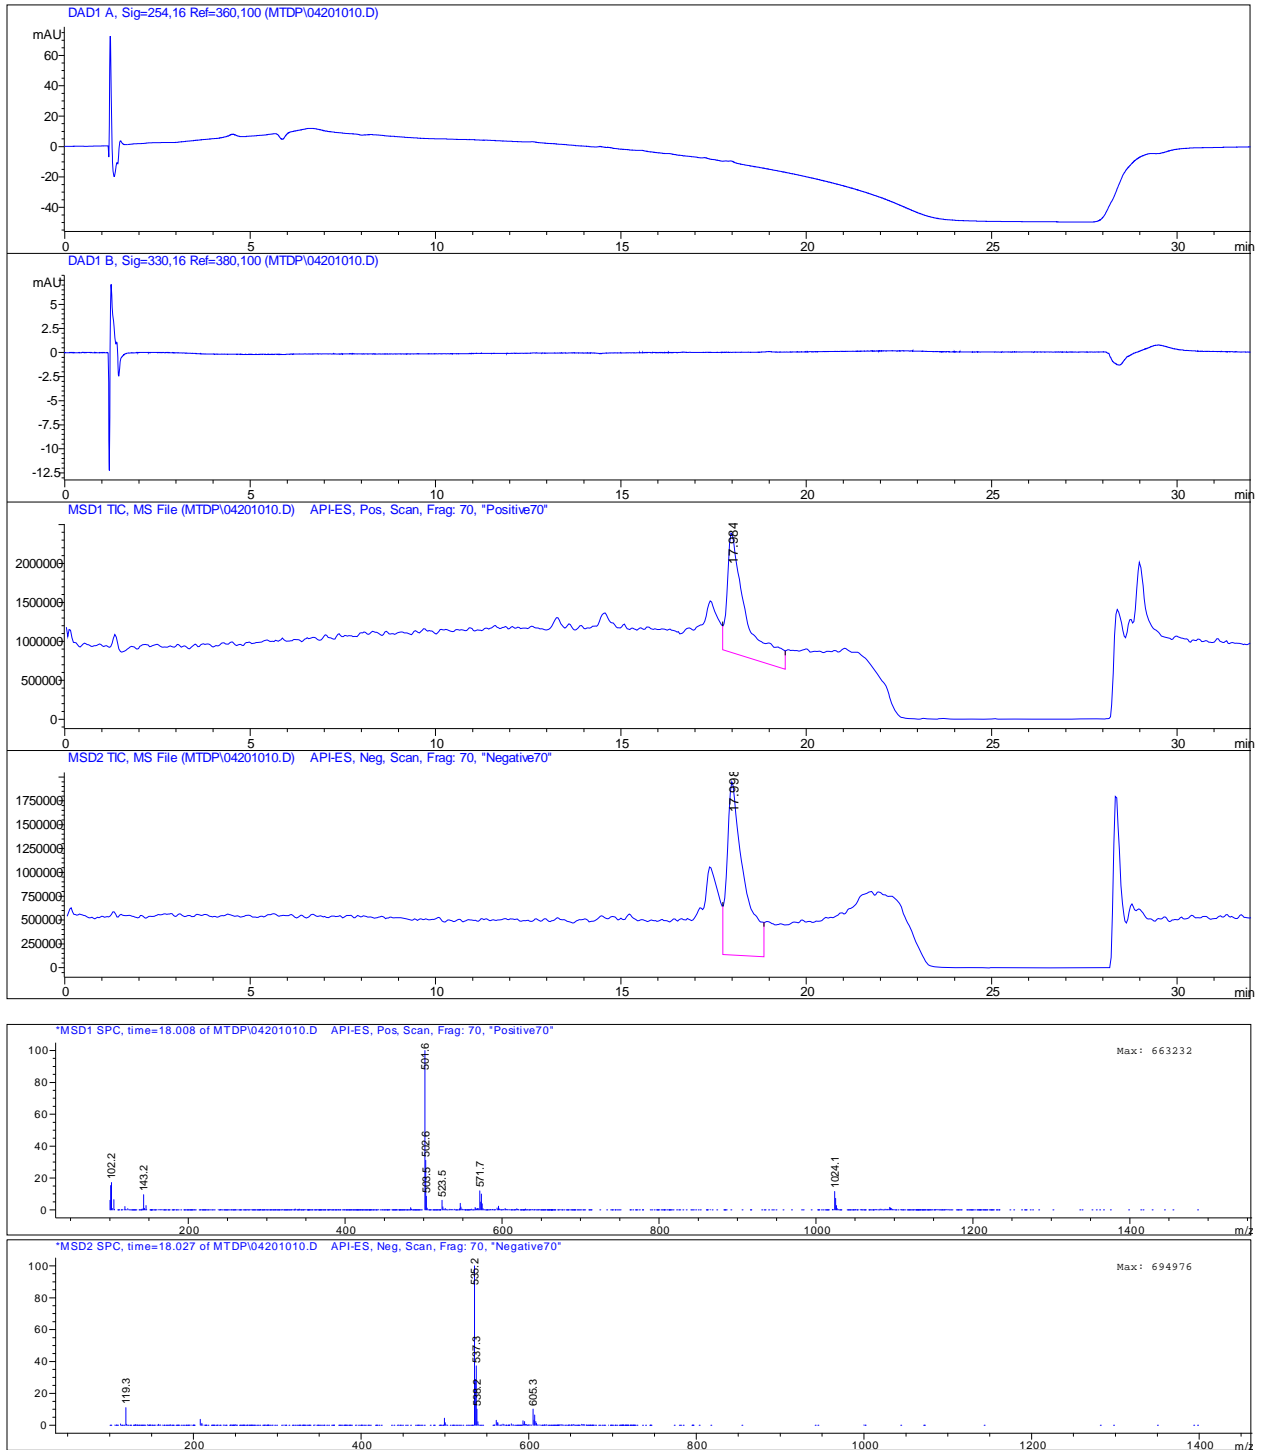



**Figure S26.** HRESIMS spectrum of cryptocaryol E (**5**).

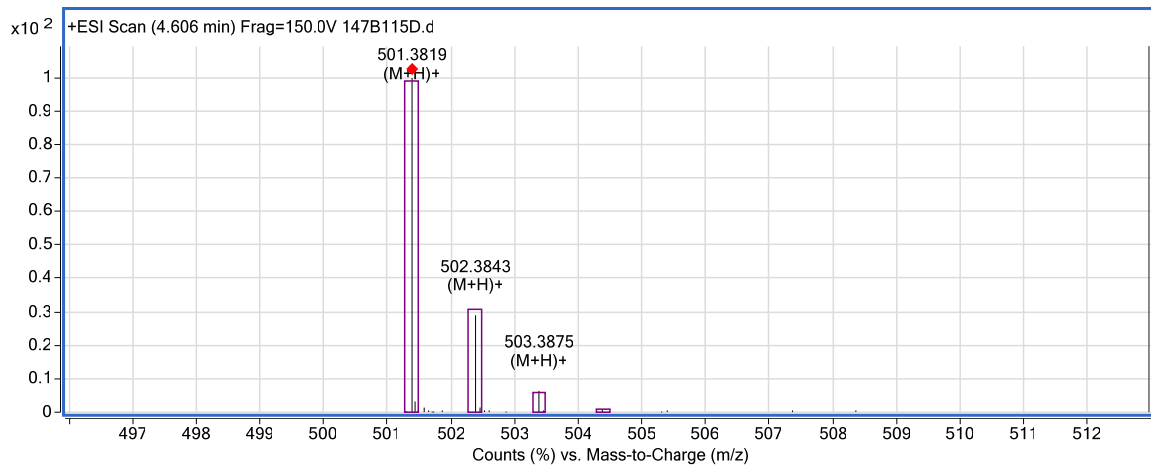

**Figure S27.** HRESIMS/MS spectra of cryptocaryol E (**5**).

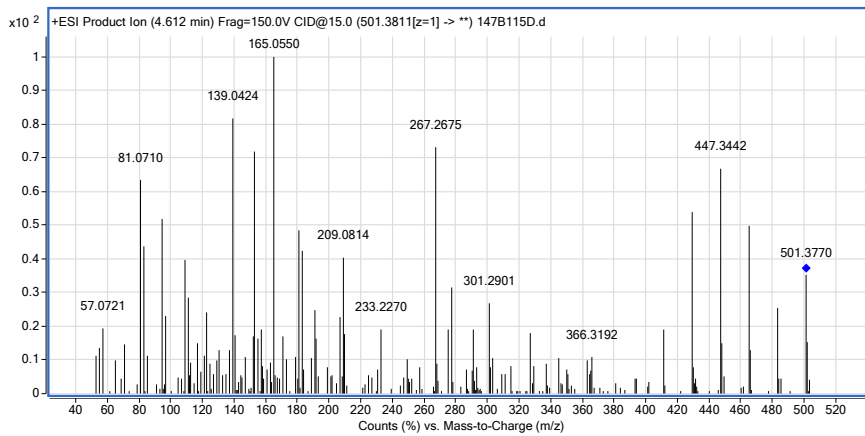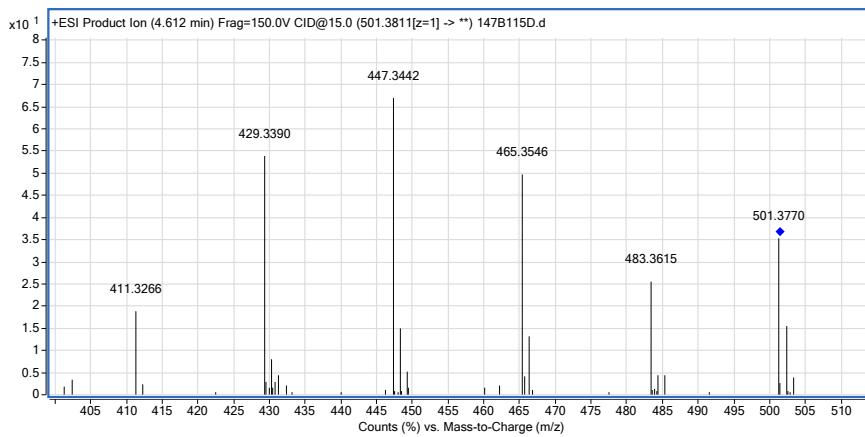

**Figure S28.**  $^1\text{H}$  NMR spectrum of cryptocaryol F (**6**) in  $\text{CD}_3\text{OD}$ .

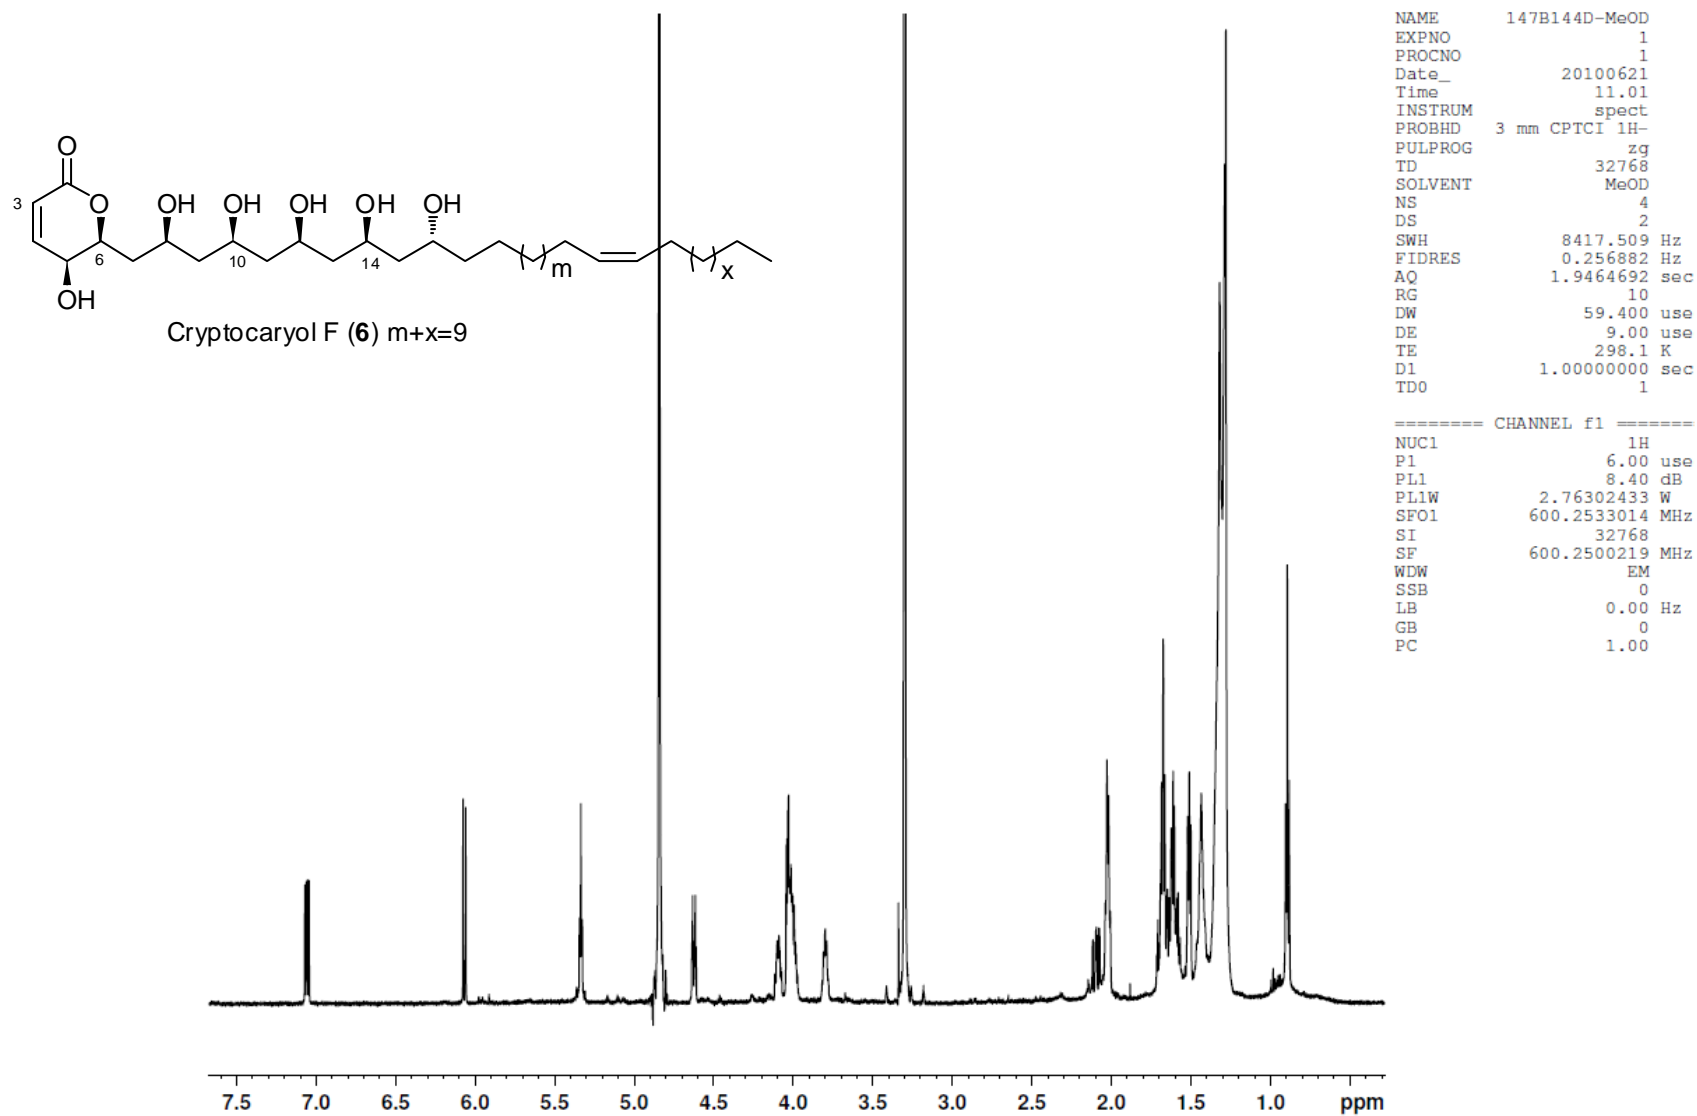

**Figure S29.**  $^{13}\text{C}$  NMR spectrum of cryptocaryol F (**6**) in  $\text{CD}_3\text{OD}$ .

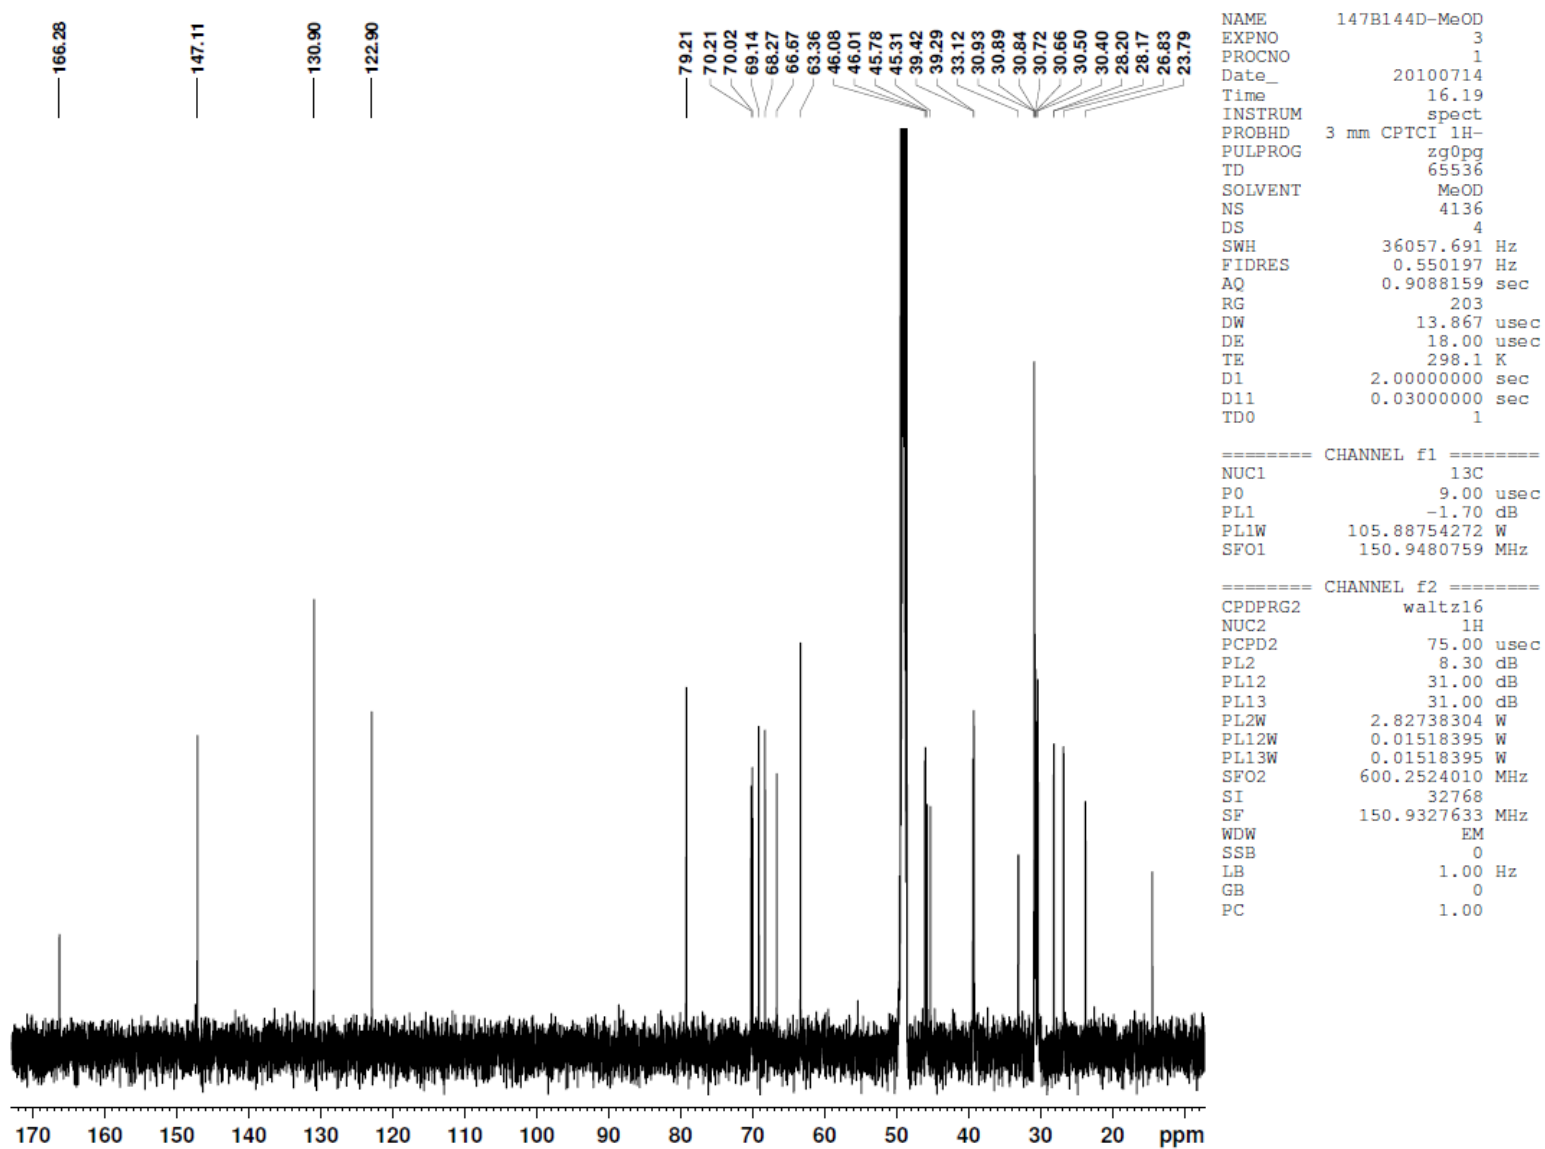

**Figure S30.** LRLCMS spectra of cryptocaryol F (6).

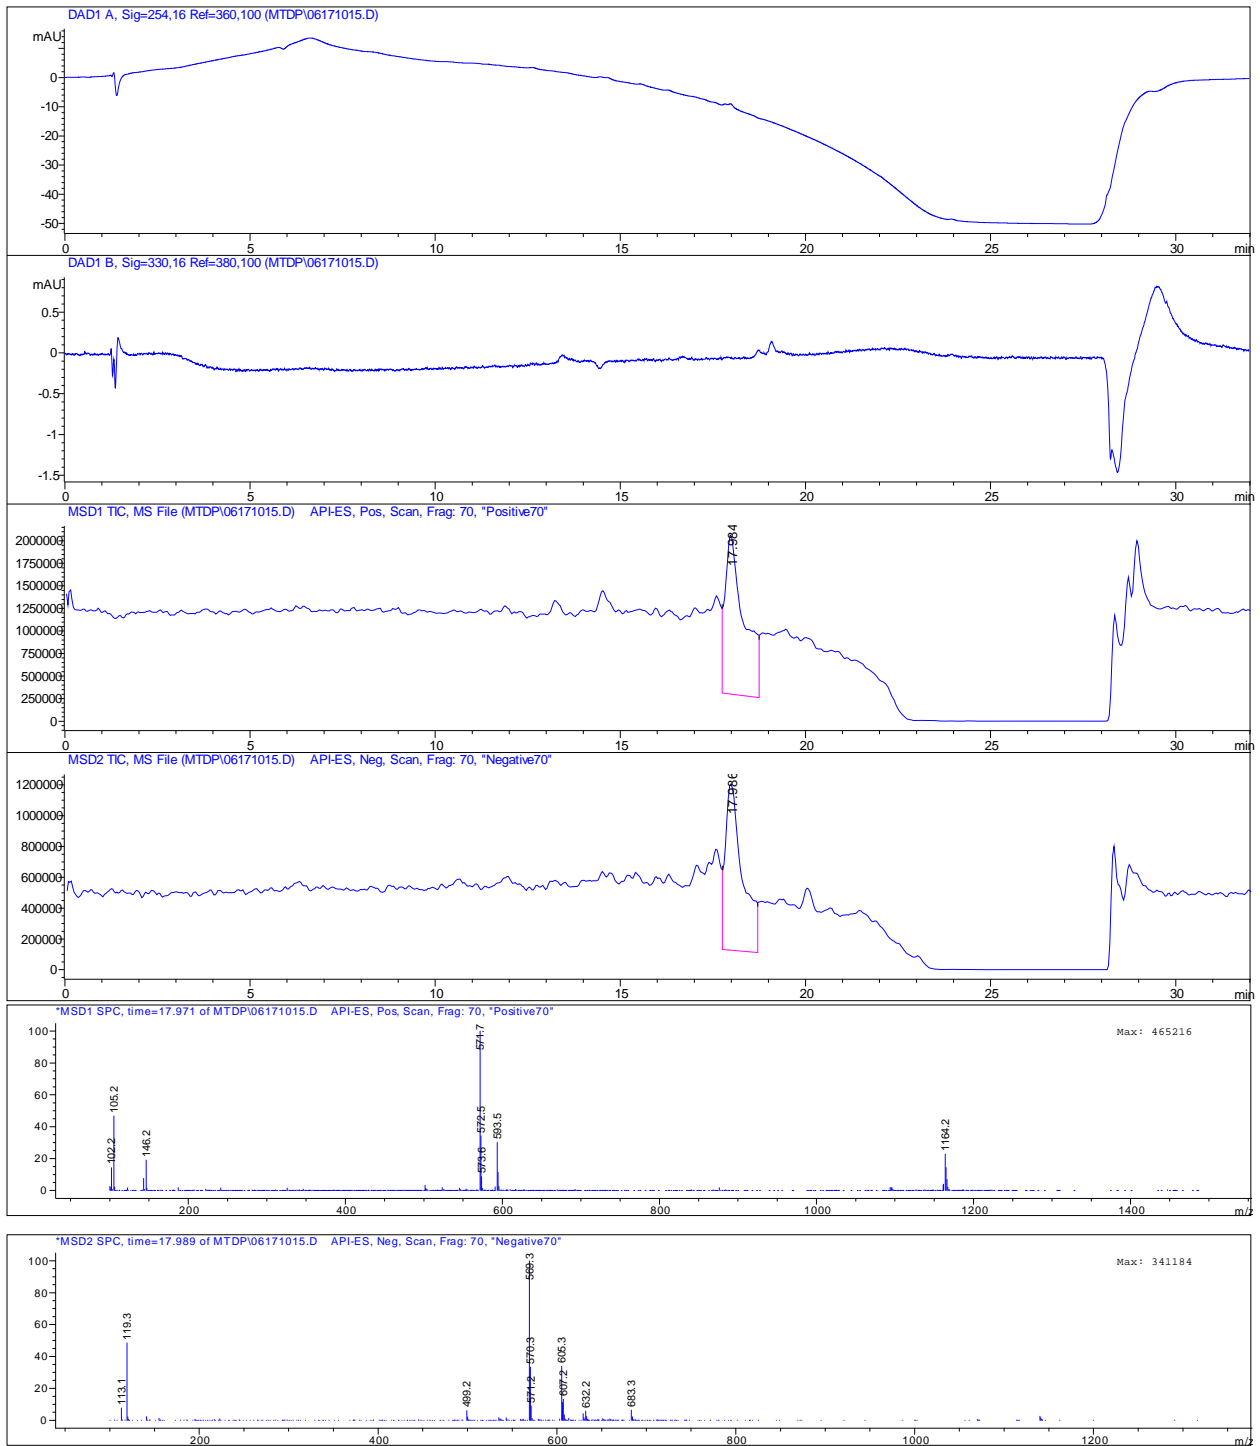

**Figure S31.** HRESIMS spectrum of cryptocaryol F (**6**).

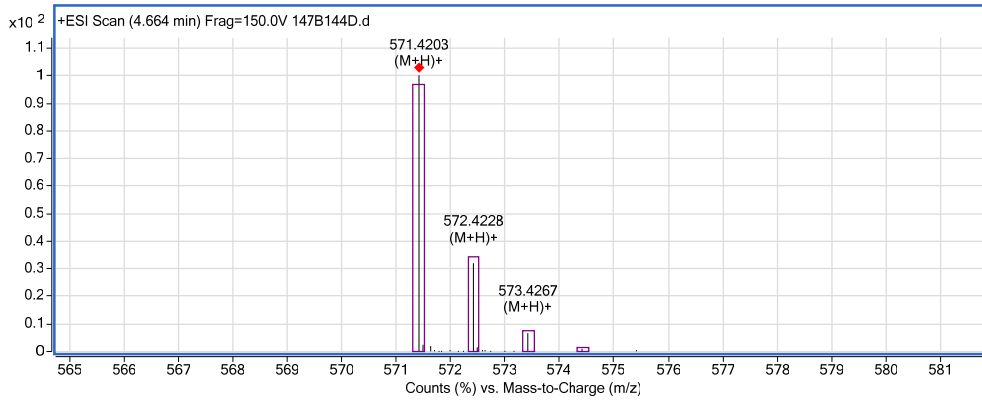

**Figure S32.** HRESIMS spectra of cryptocaryol F (**6**).

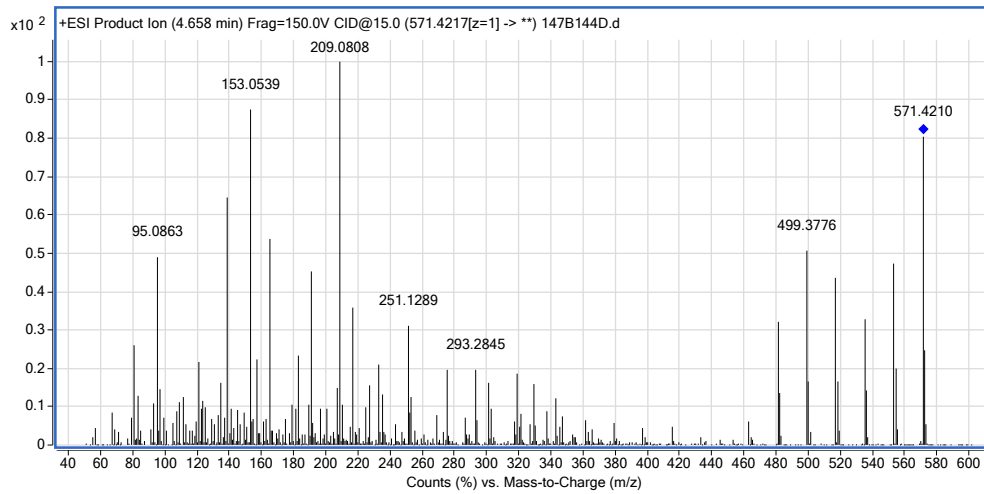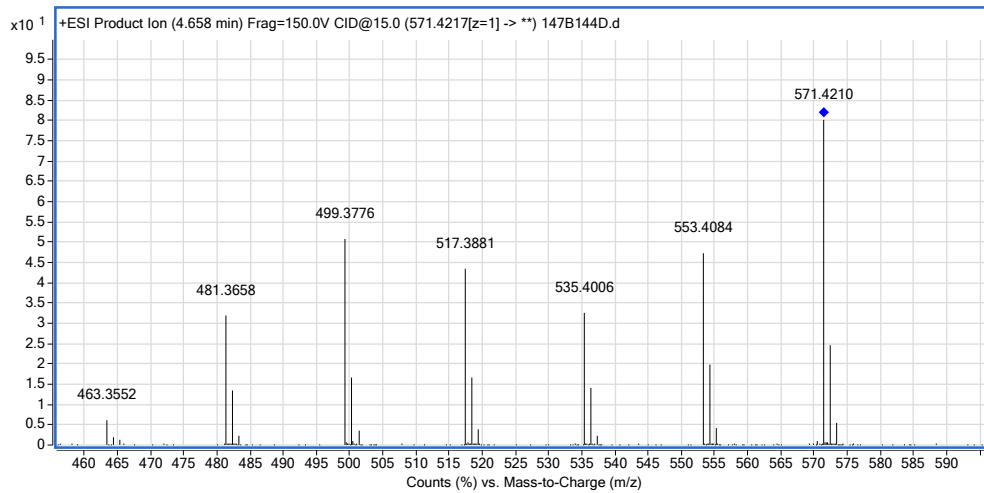

**Figure S33.**  $^1\text{H}$  NMR spectrum of cryptocaryol G (**7**) in  $\text{CD}_3\text{OD}$ .

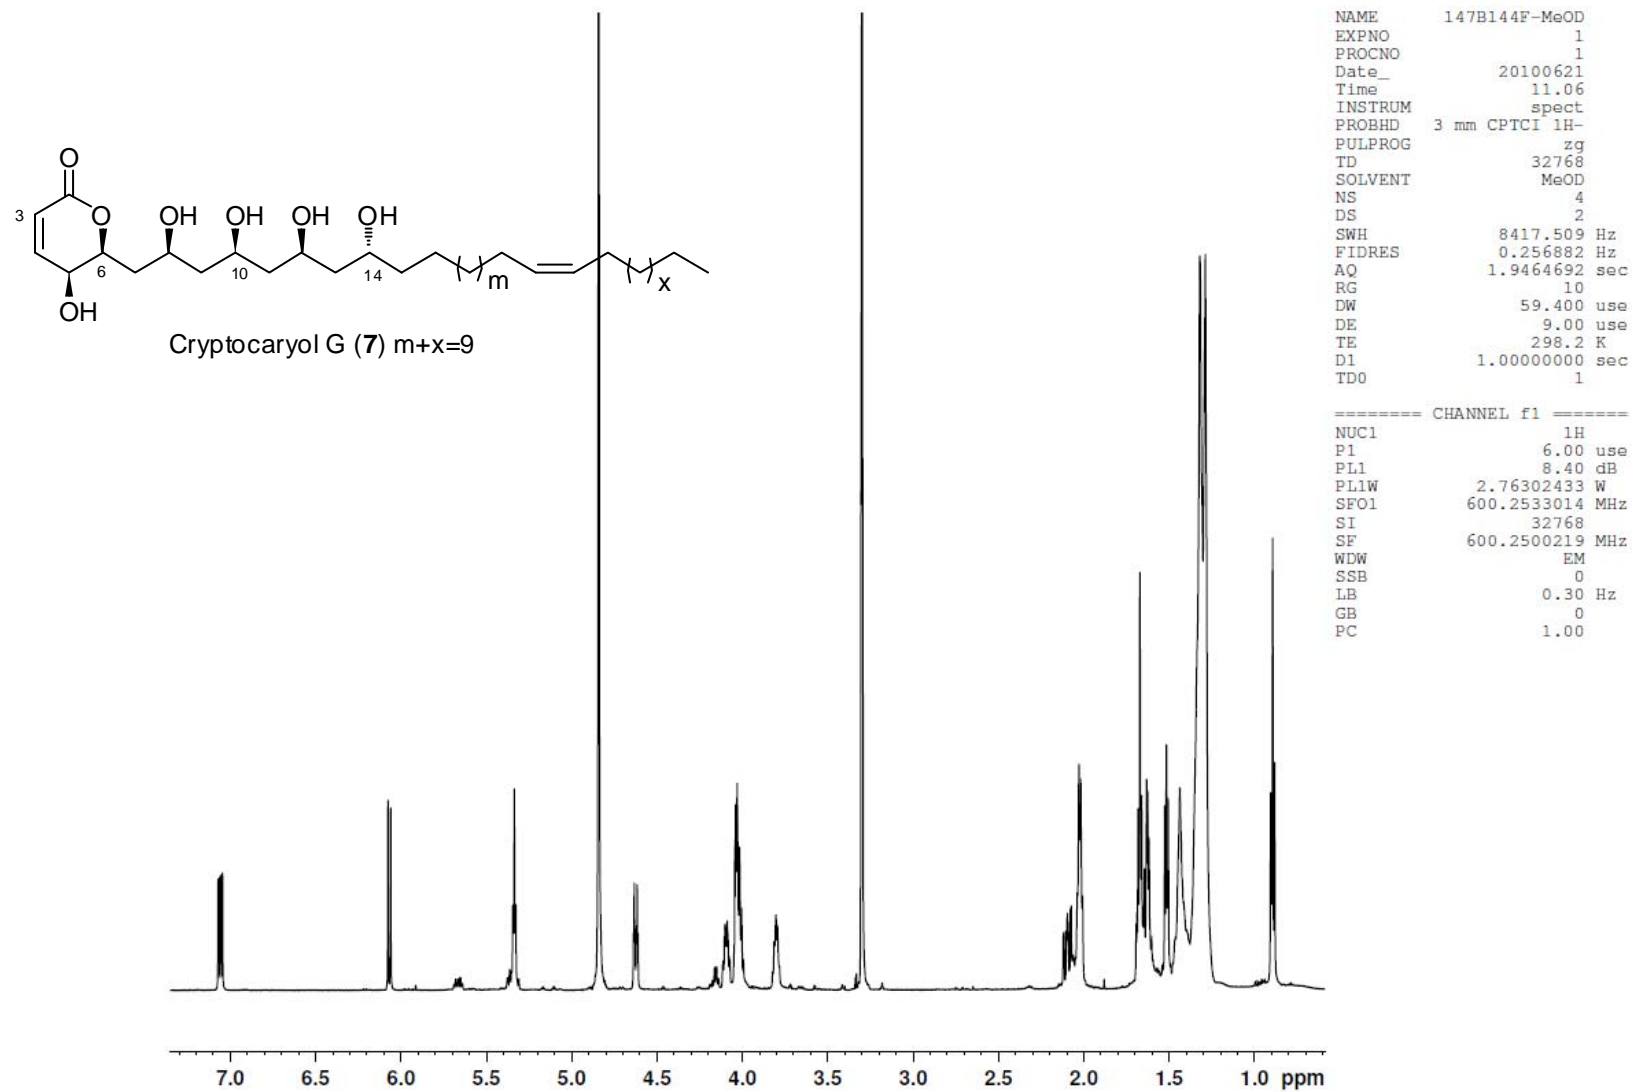

Figure S34.  $^{13}\text{C}$  NMR spectrum of cryptocaryol G (**7**) in  $\text{CD}_3\text{OD}$ .

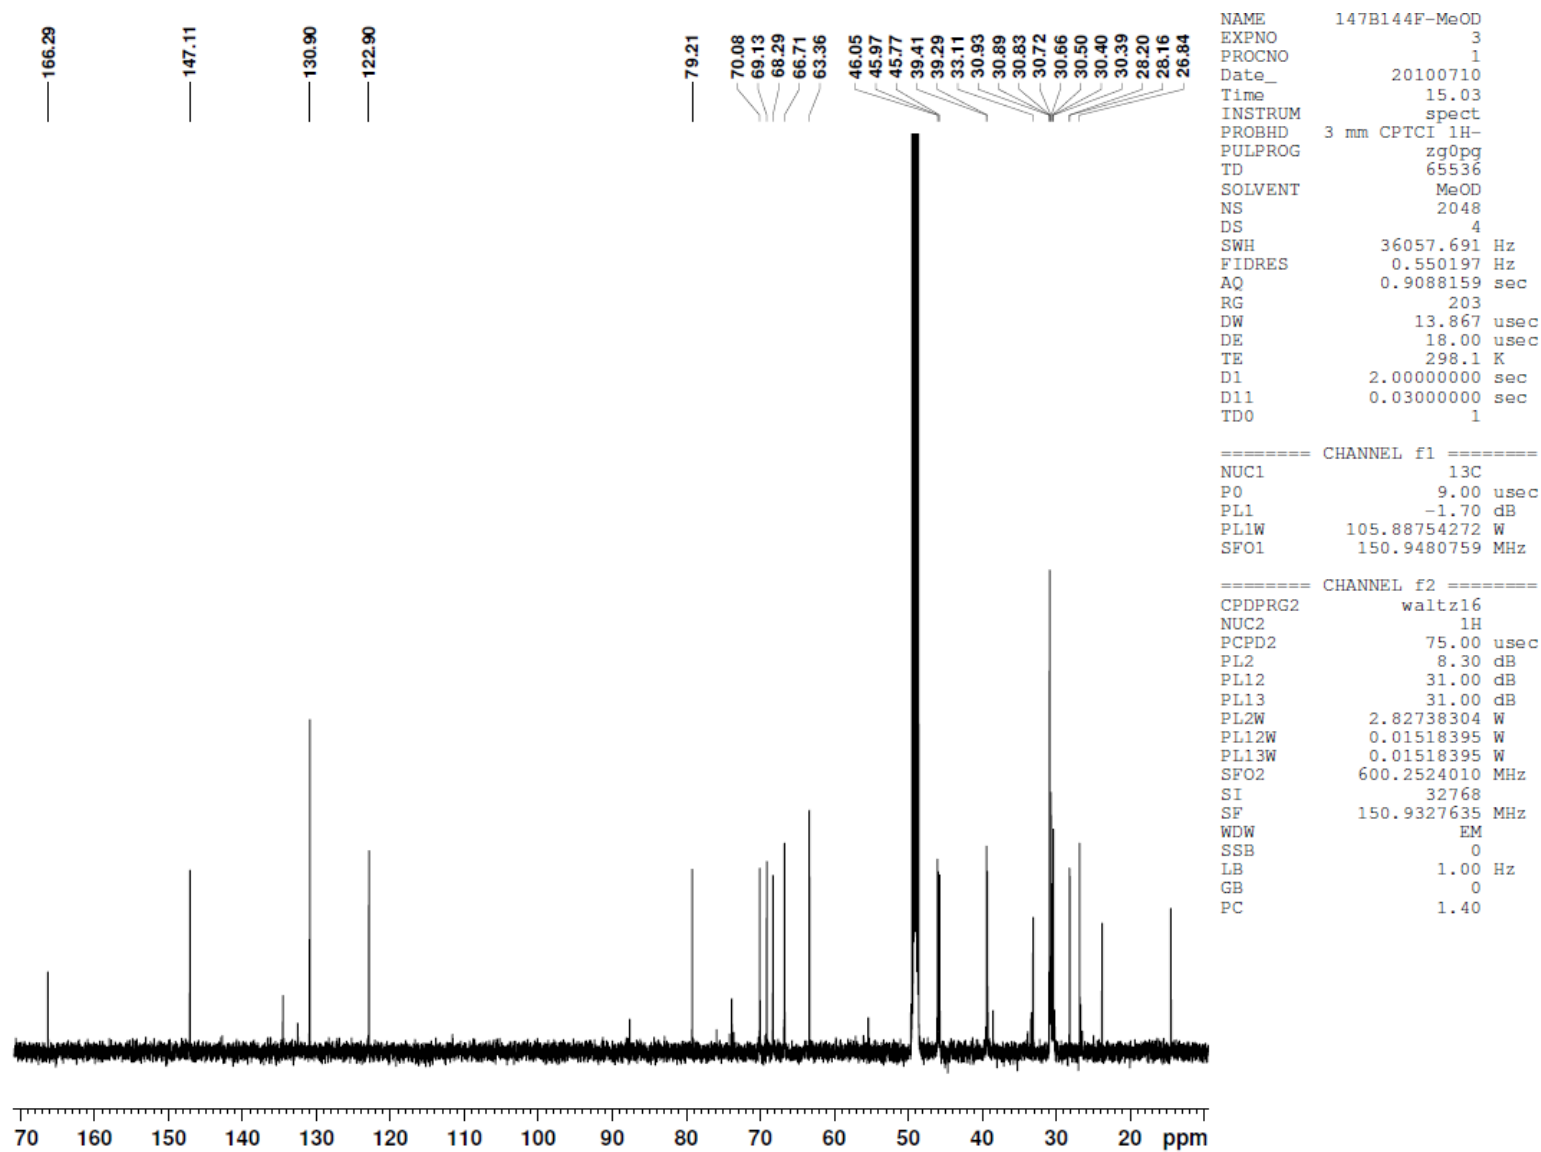

**Figure S35.** LRLCMS spectra of cryptocaryol G (7).

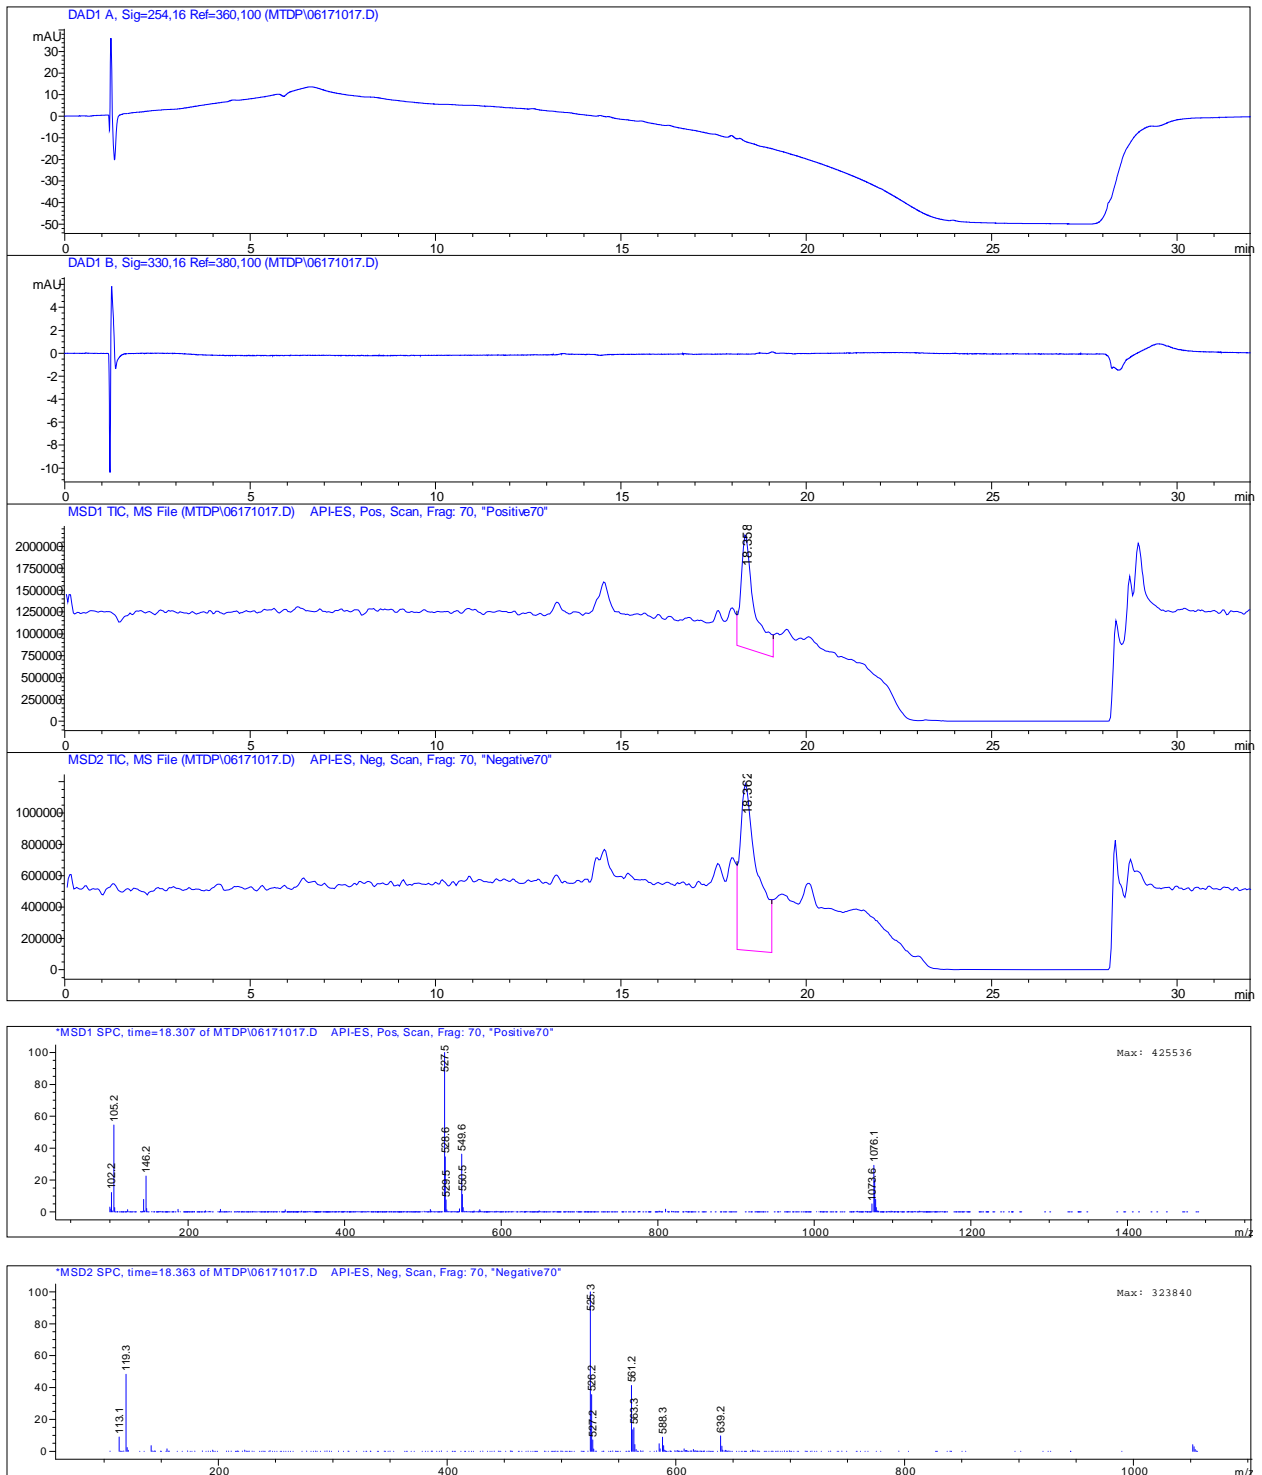



**Figure S36.** HRESIMS spectrum of cryptocaryol G (7).

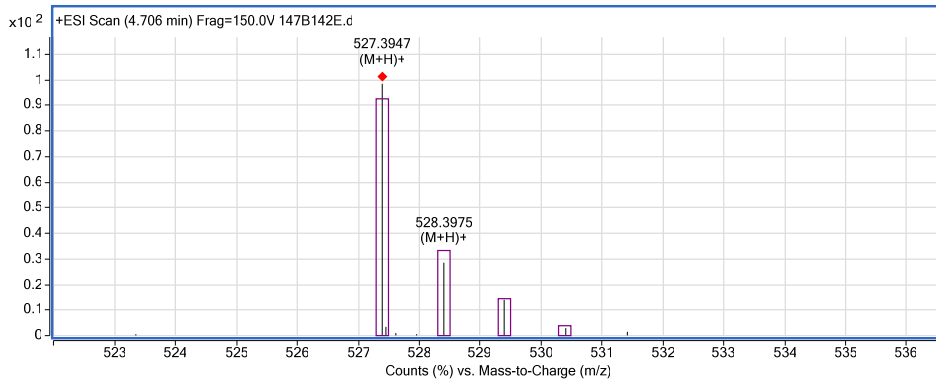

**Figure S37.** HRESIMS/MS spectra of cryptocaryol G (7).

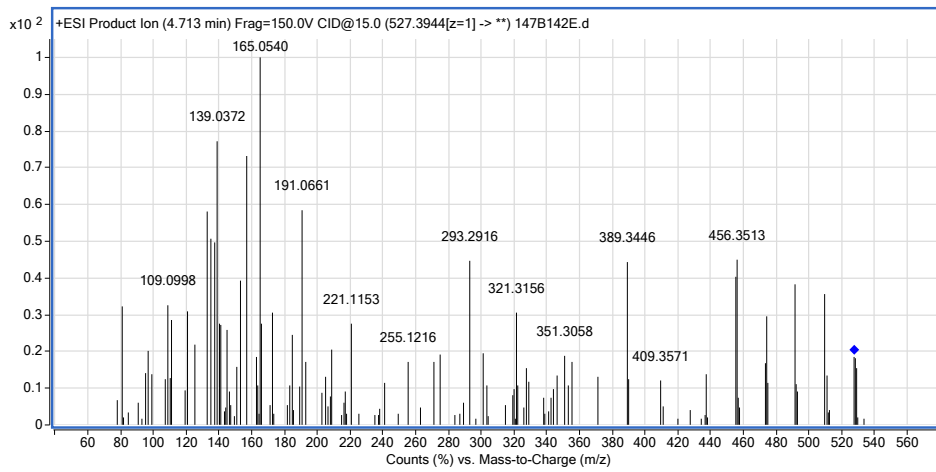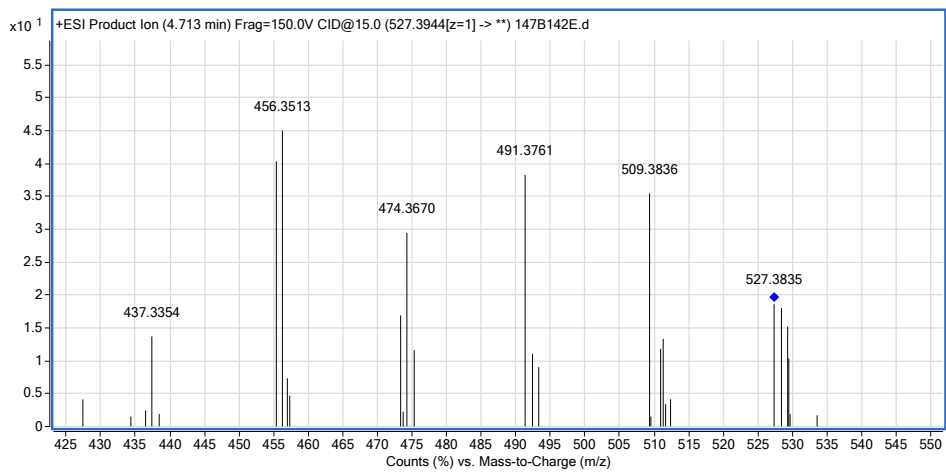

**Figure S38.**  $^1\text{H}$  NMR spectrum of cryptocaryol H (**8**) in  $\text{CD}_3\text{OD}$ .

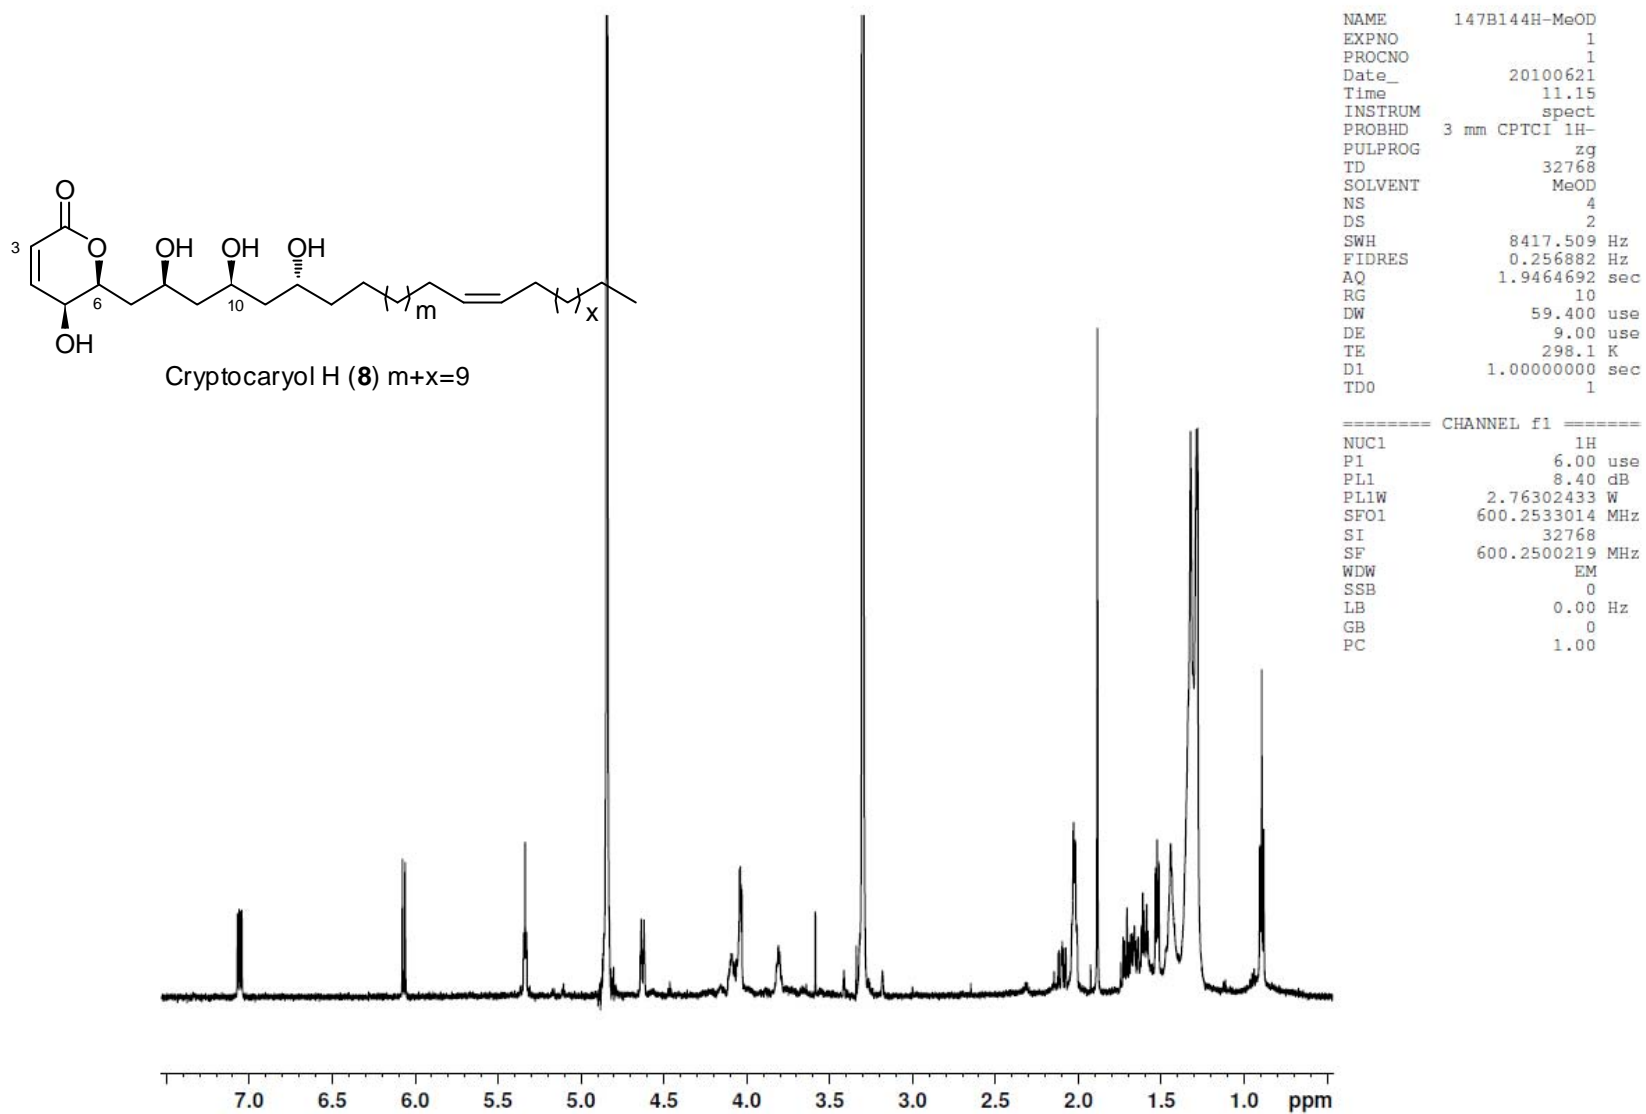

**Figure S39.**  $^{13}\text{C}$  NMR spectrum of cryptocaryol H (**8**) in  $\text{CD}_3\text{OD}$ .

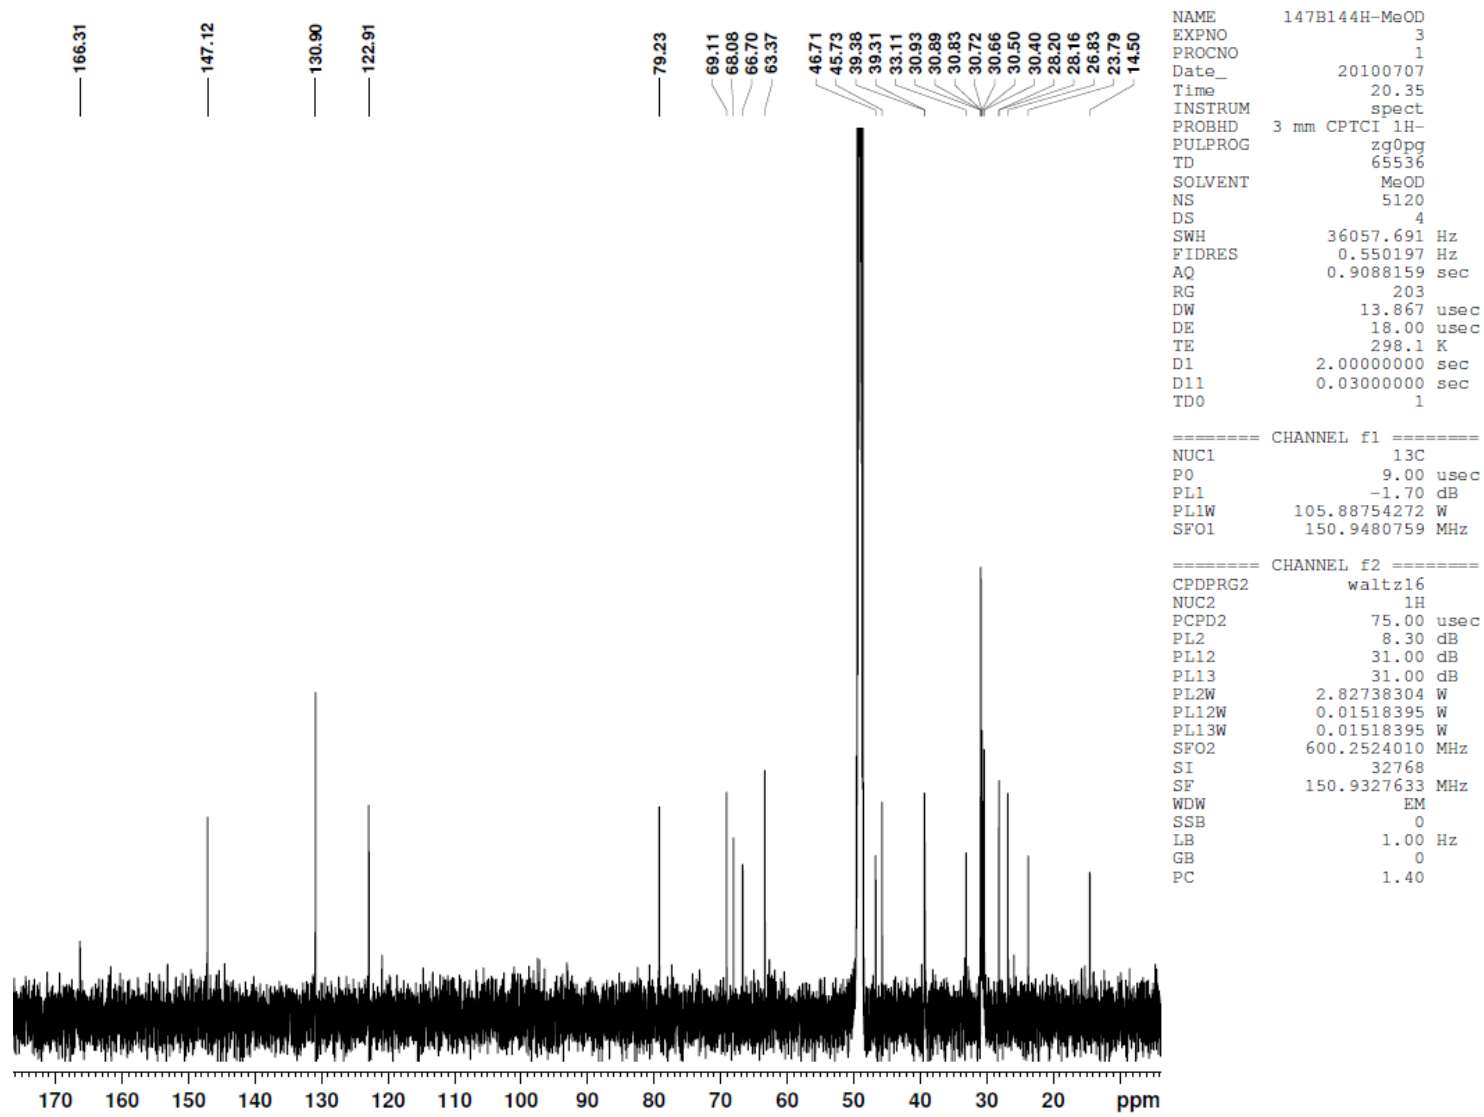

**Figure S40. LRLCMS spectra of cryptocaryol H (8).**

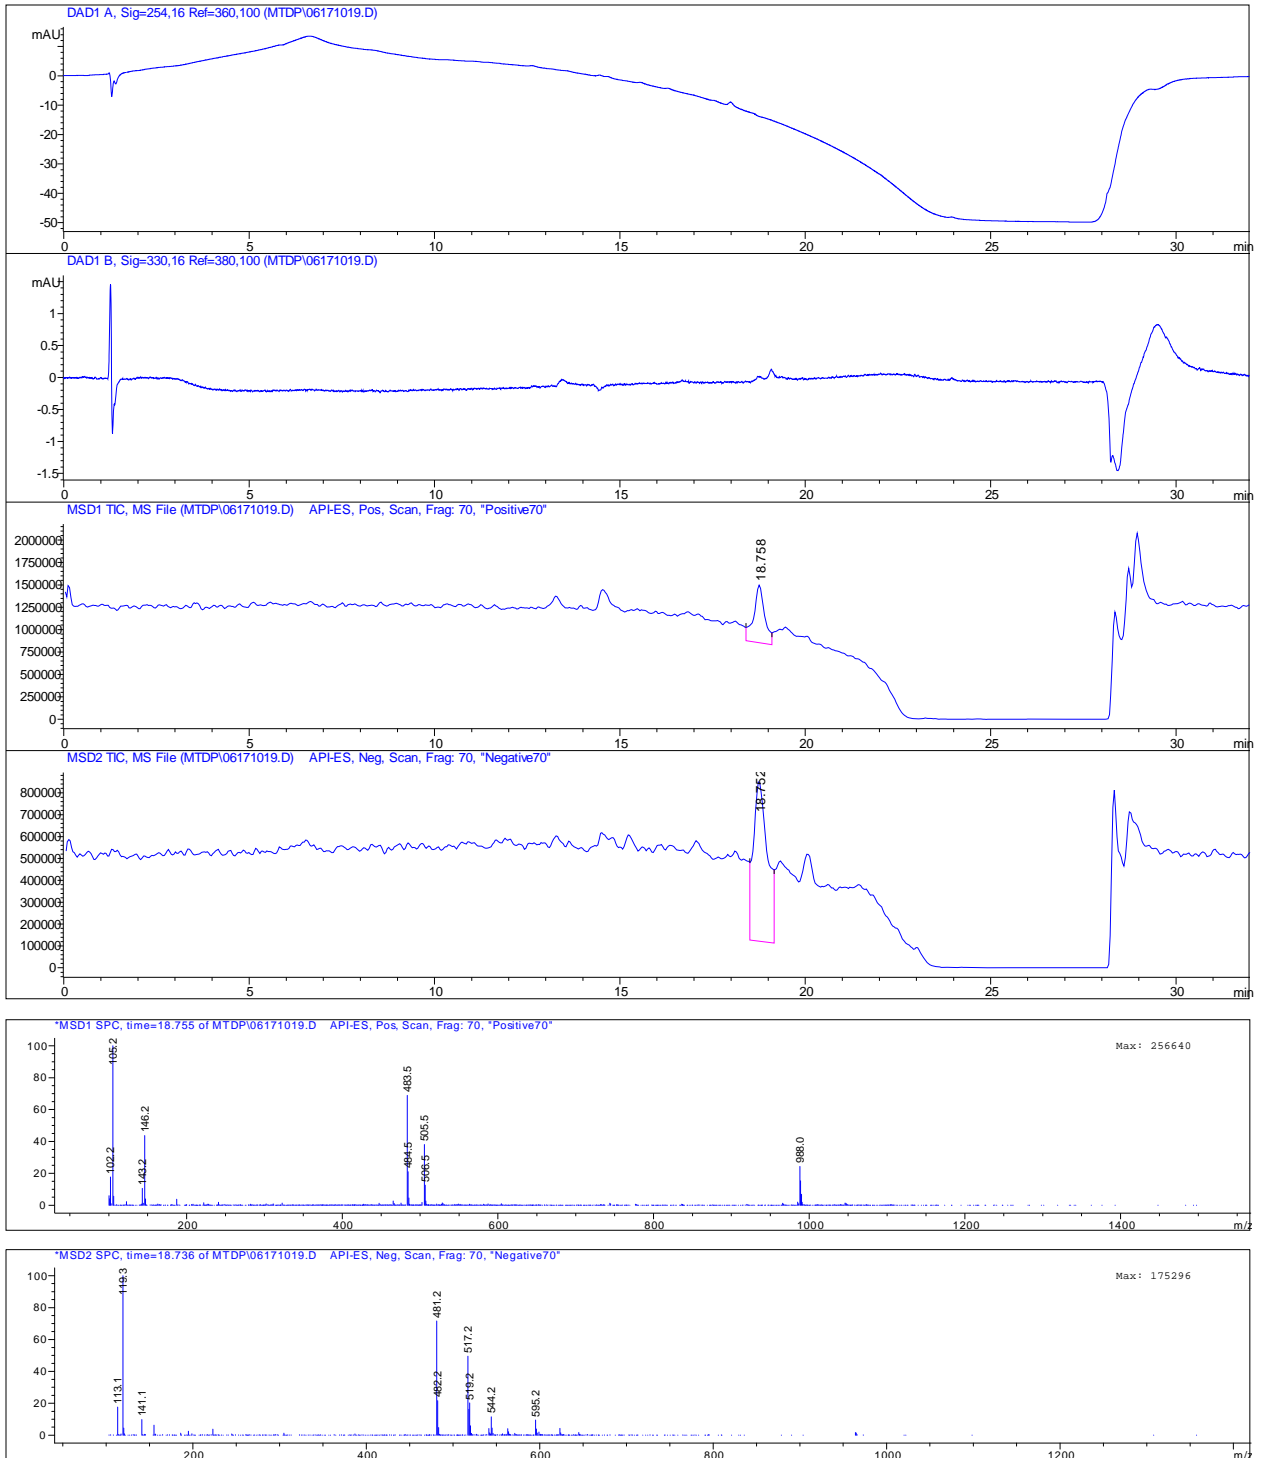

**Figure S41.** HRESIMS spectrum of cryptocaryol H (**8**).

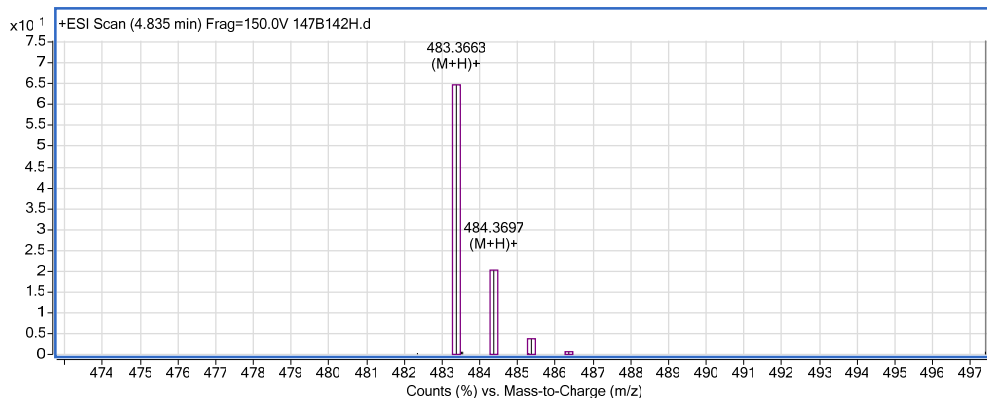

**Figure S42.** HRESIMS/MS spectra of cryptocaryol H (**8**).

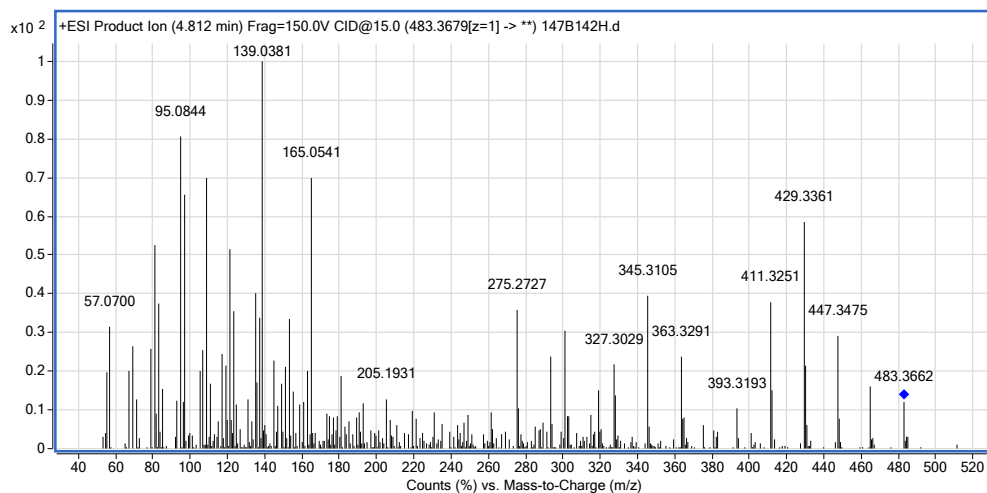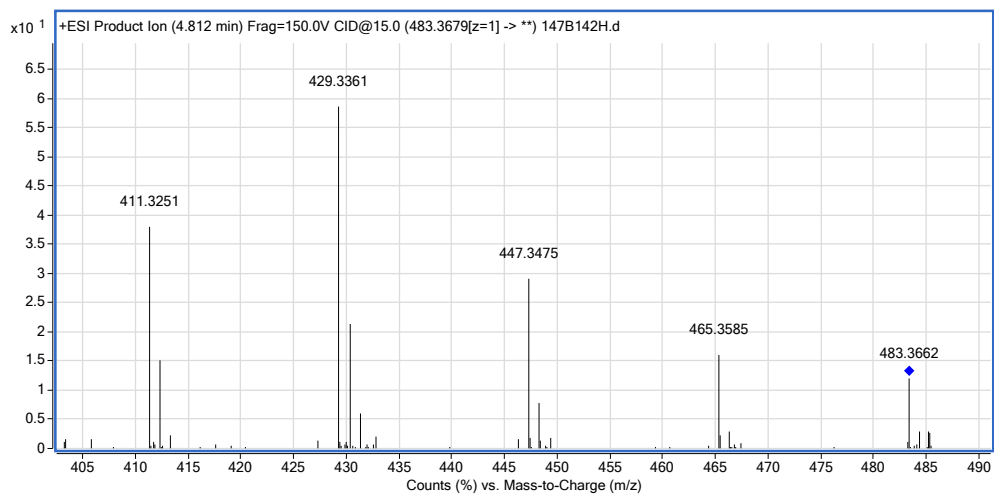

**Table S1.**  $^{13}\text{C}$  NMR data for cryptocaryols A-H (1-8) in  $\text{CD}_3\text{OD}$ .

| no.                                                                                                         | 1         | 2         | 3         | 4         | 5         | no.                                                                                                                     | 6         | 7         | 8         |
|-------------------------------------------------------------------------------------------------------------|-----------|-----------|-----------|-----------|-----------|-------------------------------------------------------------------------------------------------------------------------|-----------|-----------|-----------|
| 2                                                                                                           | 167.0     | 167.0     | 166.3     | 166.3     | 166.3     | 2                                                                                                                       | 166.3     | 166.3     | 166.3     |
| 3                                                                                                           | 121.4     | 121.4     | 122.9     | 122.9     | 122.9     | 3                                                                                                                       | 122.9     | 122.9     | 122.9     |
| 4                                                                                                           | 148.6     | 148.6     | 147.1     | 147.1     | 147.1     | 4                                                                                                                       | 147.1     | 147.1     | 147.1     |
| 5                                                                                                           | 31.0      | 31.0      | 63.4      | 63.4      | 63.4      | 5                                                                                                                       | 63.4      | 63.4      | 63.4      |
| 6                                                                                                           | 76.6      | 76.6      | 79.2      | 79.2      | 79.2      | 6                                                                                                                       | 79.2      | 79.2      | 79.2      |
| 7                                                                                                           | 43.9      | 43.9      | 39.4      | 39.5      | 39.4      | 7                                                                                                                       | 39.4      | 39.4      | 39.3      |
| 8                                                                                                           | 66.6      | 66.6      | 66.7      | 66.7      | 66.7      | 8                                                                                                                       | 66.7      | 66.7      | 66.7      |
| 9                                                                                                           | 46.0      | 45.8      | 46.1      | 46.1      | 46.1      | 9                                                                                                                       | 45.3      | 46.1      | 46.7      |
| 10                                                                                                          | 69.9      | 69.87     | 70.0      | 70.0      | 70.1      | 10                                                                                                                      | 70.0      | 70.1      | 68.1      |
| 11                                                                                                          | 45.3      | 45.3      | 46.0      | 45.3      | 46.0      | 11                                                                                                                      | 46.0      | 46.0      | 45.7      |
| 12                                                                                                          | 70.2      | 69.93     | 70.2      | 70.0      | 68.3      | 12                                                                                                                      | 70.2      | 68.3      | 69.1      |
| 13                                                                                                          | 45.9      | 45.9      | 45.8      | 45.8      | 45.8      | 13                                                                                                                      | 46.1      | 45.8      | 39.4      |
| 14                                                                                                          | 68.3      | 67.5      | 68.3      | 67.5      | 69.1      | 14                                                                                                                      | 68.3      | 69.1      | 26.8      |
| 15                                                                                                          | 45.8      | 43.3      | 45.3      | 43.3      | 39.3      | 15                                                                                                                      | 45.8      | 39.3      |           |
| 16                                                                                                          | 69.1      | 72.9      | 69.1      | 72.9      | 26.8      | 16                                                                                                                      | 69.1      | 26.8      |           |
| 17                                                                                                          | 39.3      | 36.0      | 39.3      | 36.0      |           | 17                                                                                                                      | 39.3      |           |           |
| 18                                                                                                          | 26.8      | 26.4      | 26.8      | 26.4      |           | 18                                                                                                                      | 26.8      |           |           |
| $(\underline{\text{C}}\text{H}_2)_m$                                                                        | 30.5-31.0 | 30.5-31.0 | 30.5-30.8 | 30.5-30.8 | 30.5-30.9 | $(\underline{\text{C}}\text{H}_2)_m$                                                                                    | 30.4-31.0 | 30.4-30.9 | 30.4-30.9 |
| $(\text{CH}_2)_m\underline{\text{C}}\text{H}_2\underline{\text{C}}\text{H}_2\underline{\text{C}}\text{H}_3$ | 33.2      | 33.1      | 33.2      | 33.1      | 33.1      | $\underline{\text{C}}\text{H}_2\underline{\text{C}}\text{H}=\underline{\text{C}}\text{H}\underline{\text{C}}\text{H}_2$ | 28.2      | 28.2      | 28.2      |
| $(\text{CH}_2)_m\underline{\text{C}}\text{H}_2\underline{\text{C}}\text{H}_2\underline{\text{C}}\text{H}_3$ | 23.8      | 23.8      | 23.8      | 23.8      | 23.8      | $\underline{\text{C}}\text{H}_2\underline{\text{C}}\text{H}=\underline{\text{C}}\text{H}\underline{\text{C}}\text{H}_2$ | 130.9     | 130.9     | 130.9     |
| $(\text{CH}_2)_m\underline{\text{C}}\text{H}_2\underline{\text{C}}\text{H}_2\underline{\text{C}}\text{H}_3$ | 14.5      | 14.5      | 14.5      | 14.5      | 14.5      | $(\underline{\text{C}}\text{H}_2)_x$                                                                                    | 30.4-31.0 | 30.4-30.9 | 30.4-30.9 |
| $\text{O}\underline{\text{C}}\text{O}\underline{\text{C}}\text{H}_3$                                        |           | 173.2     |           | 173.2     |           | $(\text{CH}_2)_x\underline{\text{C}}\text{H}_2\underline{\text{C}}\text{H}_2\underline{\text{C}}\text{H}_3$             | 33.1      | 33.1      | 33.1      |
| $\text{O}\underline{\text{C}}\text{O}\underline{\text{C}}\text{H}_3$                                        |           | 21.2      |           | 21.2      |           | $(\text{CH}_2)_x\underline{\text{C}}\text{H}_2\underline{\text{C}}\text{H}_2\underline{\text{C}}\text{H}_3$             | 23.8      | 23.8      | 23.8      |
|                                                                                                             |           |           |           |           |           | $(\text{CH}_2)_x\underline{\text{C}}\text{H}_2\underline{\text{C}}\text{H}_2\underline{\text{C}}\text{H}_3$             | 14.5      | 14.5      | 14.5      |
